## PDXNet Portal: Patient-Derived Xenograft model, data, workflow, and tool discovery

### Running Title:

PDXNet Portal

### Authors:

Soner Koc <sup>\*,1</sup>, Michael W. Lloyd <sup>\*,2</sup>, Jeffrey Grover <sup>1</sup>, Sara Seepo <sup>1</sup>, Sai Lakshmi Subramanian<sup>1</sup>, Manisha Ray<sup>1</sup>, Christian Frech <sup>1</sup>, John DiGiovanna <sup>1</sup>, Phillip Webster <sup>1</sup>, Steven Neuhauser <sup>2</sup>, Anuj Srivastava <sup>3</sup>, Xing Yi Woo <sup>3</sup>, Brian J. Sanderson <sup>3</sup>, Brian White <sup>3</sup>, Paul Lott <sup>4</sup>, PDXNet Consortium, Yvonne A. Evrard <sup>5</sup>, Tiffany A. Wallace <sup>6</sup>, Jeffrey A. Moscow <sup>7</sup>, James H. Doroshov <sup>8</sup>, Nicholas Mitsiades <sup>9</sup>, Salma Kaochar <sup>9</sup>, Chong-xian Pan <sup>4,10</sup>, Moon S. Chen Jr. <sup>4</sup>, Luis Carvajal-Carmona <sup>4</sup>, Alana L. Welm <sup>11</sup>, Bryan E. Welm <sup>11</sup>, Michael T. Lewis <sup>9</sup>, Ramaswamy Govindan <sup>12</sup>, Li Ding <sup>12</sup>, Shunquang Li <sup>12</sup>, Meenherd Herlyn <sup>13</sup>, Mike Davies <sup>14</sup>, Jack Roth <sup>14</sup>, Funda Meric-Bernstam <sup>14</sup>, Peter N. Robinson <sup>3</sup>, Carol J. Bult <sup>2</sup>, Brandi Davis-Dusenbery <sup>1</sup>, Dennis A. Dean II <sup>1,#</sup>, Jeffrey H. Chuang <sup>3,#,&</sup>

1: Seven Bridges, Charlestown, MA.

2: The Jackson Laboratory, Bar Harbor, ME.

3: The Jackson Laboratory for Genomic Medicine, Farmington, CT.

4: University of California - Davis, Davis, CA.

5: Leidos Biomedical Research, Inc, Frederick National Laboratory for Cancer Research, Frederick, MD.

6: Center to Reduce Health Disparities, National Cancer Institute, Bethesda, MD.

7: Investigational Drug Branch, National Cancer Institute, Bethesda, MD.

8: Division of Cancer Treatment and Diagnosis, National Cancer Institute, Bethesda, MD.

9: Baylor College of Medicine, Houston, TX.

10: Harvard Medical School, West Roxbury, MA.

11: Huntsman Cancer Institute, Salt Lake City, UT.

12: Washington University School of Medicine, St. Louis, MO.

13: The Wistar Institute, Philadelphia, PA.

14: The University of Texas MD Anderson Cancer Center, Houston, TX.

\* Mr. Koc and Dr. Lloyd are co-first authors providing an equal contribution to the manuscript

# Drs. Dean and Chuang are co-senior authors providing equivalent oversight to work presented in this manuscript

& Dr. Chuang is the corresponding author

### Keywords:

PDX Models, Tumor Volume Data, RNA-Seq, Whole Exome, and PDMR

### Financial Support:

This work was supported by NIH funding to the PDXNet Data Commons and Coordination Center (NCI U24-CA224067) to the PDX Development and Trial Centers (NCI U54-CA224083, NCI U54-CA224070, NCI U54-CA224065, NCI U54-CA224076, NCI U54-CA233223, and NCI U54-CA233306). The Cancer Genomics Cloud powered by Seven Bridges is a Cancer Research Data Commons Cloud Resource, funded in whole or in part with Federal funds from the National Cancer Institute, National Institutes of Health, Contract No. HHSN261201400008C and ID/IQ Agreement No. 17X146 under Contract No. HHSN261201500003I and 75N91019D00024.

### Conflict of Interest:

The University of Utah may choose to license PDX models developed in the Welm labs, which may result in tangible property royalties to Drs. Welm and members of their lab who developed the models. MTL is a founder and limited partner in StemMed Ltd. and a manager in StemMed Holdings, it's general partner. He is a founder and equity stake holder in Tvardi Therapeutics Inc. Some PDX are exclusively licensed to StemMed Ltd. resulting in royalty income to MTL. Lacey Dobrolecki is a compensated employee of StemMed Ltd. The other authors declare no competing interest.

Word Count: 4,148

# of Figures: 4

# of Tables: 3

### Contact information:

Prof. Jeffrey H. Chuang

The Jackson Laboratory for Genomic Medicine

10 Discovery Drive Farmington, CT 06032

Phone: 837-856-2473

Email: [jeff.chuang@jax.org](mailto:jeff.chuang@jax.org)

## 1 **Abstract**

2 We created the PDX Network (PDXNet) Portal (<https://portal.pdxnetwork.org/>) to centralize  
3 access to the National Cancer Institute-funded PDXNet consortium resources (i.e., PDX models,  
4 sequencing data, treatment response data, and bioinformatics workflows), to facilitate  
5 collaboration among researchers, and to make resources easily available for research. The portal  
6 includes sections for resources, analysis results, metrics for PDXNet activities, data processing  
7 protocols, and training materials for processing PDX data.

8 The initial portal release highlights PDXNet model and data resources, including 334 new models  
9 across 33 cancer types. Tissue samples of these models were deposited in the NCI's Patient-  
10 Derived Model Repository (PDMR) for public access. These models have 2,822 associated  
11 sequencing files from 873 samples across 307 patients, which are hosted on the Cancer Genomics  
12 Cloud powered by Seven Bridges and the NCI Cancer Data Service for long-term storage and  
13 access with dbGaP permissions. The portal also includes results from standardized analysis  
14 workflows on PDXNet sequencing files and PDMR data (2,594 samples from 463 patients across  
15 78 disease types). These 15 analysis workflows for whole-exome and RNA-Seq data are freely  
16 available, robust, validated, and standardized.

17 The model and data lists will grow substantially over the next two years and will be continuously  
18 updated as new data are available. PDXNet models support multi-agent treatment studies,  
19 determination of sensitivity and resistance mechanisms, and preclinical trials. The PDXNet portal  
20 is a centralized location for these data and resources, which we expect to be of significant utility  
21 for the cancer research community.

## 22 Introduction

23 Patient-Derived Xenograft (PDX) models are cancer models that support personalized medicine  
24 research and preclinical and co-clinical trials<sup>1-5</sup>. Specific PDX research areas include the study of  
25 sensitivity and resistance mechanisms, evaluation of new treatment options, and the study of tumor  
26 heterogeneity. The PDX research community is rapidly growing, with PDX-generated data being  
27 the preferred support for proposing human clinical trials<sup>6</sup>. In 2017, the National Cancer Institute  
28 (NCI) funded the PDX Development and Trial Centers (PDTC) research network (PDXNet,  
29 [pdxnetwork.org](http://pdxnetwork.org)) consortium to accelerate PDX research by developing new PDX models across  
30 cancer types, identifying new multi-agent treatments to bring forward into clinical trials,  
31 generating complementary RNA-Seq and whole-exome sequencing data, and increasing the ethnic  
32 diversity of publicly available PDX models.

33 PDXNet was also charged with developing collaborative research projects involving the 6 different  
34 PDTCs to advance PDX science. Each of the PDTCs came into PDXNet with its own home-grown  
35 data standards, data analytic pipelines and workflows. To facilitate collaboration, the disparate  
36 processes and databases required harmonization at many different steps, so that data from centers  
37 could be combined and analyzed efficiently. The harmonization goal was achieved through the  
38 creation of the PDXNet portal and the analytical tools within it. The PDXNet portal resources  
39 created by this effort enabled the successful completion of several collaborative research projects  
40 <sup>7-10</sup> and are supporting many others.

41 In addition to facilitating PDXNet research, an additional benefit of the PDXNet Portal is to make  
42 the PDXNet-generated data and workflows of the PDXNet Portal available as a public resource.  
43 These data will support cancer research by increasing the quantity and diversity of PDX data  
44 available and decreasing the effort required to analyze PDX sequencing data. We present the  
45 PDXNet Portal as a utility for PDXNet data for the larger scientific community.

46 There are several existing public PDX resources that complement the PDXNet Portal. Launched  
47 in 2012, the NCI Patient-Derived Model Patient Repository (PDMR)<sup>11</sup> collects and develops PDX  
48 models and associated standardized sequencing data (RNA-Seq and whole-exome), with the goal  
49 of supporting academic and industry research. The PDMR maintains a publicly available database  
50 of models and an File Transfer Protocol (FTP) site for accessing sequencing data. Another resource  
51 is PDXFinder<sup>12</sup>. PDXFinder is an online resource that aims to harmonize internationally generated  
52 PDX models and their associated metadata. PDXFinder is a collaboration between the European  
53 Molecular Biology Laboratory's European Bioinformatics Institute (EMBL-EBI) and the Jackson  
54 Laboratory. A key component of data harmonization in PDXFinder is the PDX minimal  
55 information standard (PDX-MI)<sup>13</sup>, which allows for standardized PDX information exchange.  
56 PDXFinder employs PDX-MI to support complex model searches that enable users to identify  
57 model descriptions and subsequently link to model information and a request form. EuroPDX is a  
58 consortium of eighteen non-profit cancer institutes that collaborate and coordinate PDX model  
59 development and access to improve cancer patients' standard of care. Next, the EuroPDX Data  
60 Portal (<https://dataportal.europdx.eu/>) is a resource that provides information about PDX models  
61 generated by EuroPDX researchers and clinicians. Lastly, the Baylor College of Medicine PDX  
62 Portal (<https://pdxportal.research.bcm.edu/>) provides access to breast cancer, leukemia, pediatric  
63 liver cancer, pancreatic cancer, and sarcoma model collections.

64 The primary aim of the PDXNet Portal is to support the Cancer Moonshot<sup>14</sup> model and data sharing  
65 goals<sup>15</sup>. The PDXNet Portal facilitates the distribution of resources, complementary data analyses,  
66 and developed tools. The resources generated include data collections and standardized  
67 bioinformatics workflows. Complementary data analyses such as data quality control analyses that  
68 support data-use are also available from the portal. Tools developed to support the use of the data  
69 (e.g., workflow cost estimation) are also accessible. Integration with the NCI Cloud Resource, the  
70 Cancer Genomics Cloud powered by Seven Bridges (CGC)<sup>16</sup>, allows approved researchers to  
71 directly analyze PDXNet data or use developed workflows on private data. This manuscript details  
72 the PDXNet portal features that provide a gateway for identifying and accessing resources  
73 generated by the PDXNet community.

## 74 **Portal Design and Organization**

75 The PDXNet Portal is designed to support coordination with other resources, including the PDMR,  
76 the CGC, and the NCI Cancer Data Service (CDS)<sup>17</sup>. Currently, the PDXNet portal references  
77 PDMR model information, genomic, transcriptomic, and tumor volume response data used in  
78 PDXNet research activities. The CGC serves as a PDXNet data staging area supporting data  
79 harmonization, standardized data processing, and research activities. The PDXNet Portal supports  
80 submission of sequencing data to the CDS to provide long-term research access to PDXNet data  
81 resources. The CDS is part of the NCI Cancer Research Data Commons which aims to store data  
82 resources generated by NCI-funded research. The CDS is available from across the NCI data  
83 infrastructure through a dbGaP access mechanism. The PDXNet portal augments the dbGaP  
84 submission process, through an administrative feature for generating data reports and through a  
85 dbGaP submission tool written to support CDS submissions. The PDXNet Portal aims to use data  
86 standards when they exist, supporting both the PDX-MI standard<sup>13</sup> and the PDMR data  
87 structures<sup>11</sup>. These existing data structures allow for collaboration and information sharing with  
88 existing PDX resources.

## 89 **Portal Features**

90 The PDXNet Portal is a publicly accessible website (<https://portal.pdxnetwork.org/>) with the  
91 primary function of providing access to the PDXNet models and information on how to obtain  
92 sequencing data. We extended the portal's primary mission to include additional resources,  
93 including supporting access to the PDMR sequencing file data set, a PDXNet hematoxylin and  
94 eosin stain image data set, and PDMR tumor volume data. Below, we describe the features and  
95 sections of the Portal in detail.

### 96 **PDXNet Portal Landing Page**

97 The PDXNet Portal Landing page includes an overview and summary panel of contents (Figure  
98 1). The Portal overview identifies the primary PDXNet funding sources and participants. In  
99 summary, the NCI Cancer Therapy Evaluation Program (CTEP) funds four PDTCs and the  
100 PDCCC, whereas the NCI Center to Reduce Cancer Health Disparities funds two PDTCs (see  
101 Table 1 for additional details). The portal directs questions and requests for additional information  
102 to the PDXNet website at <https://pdxnetwork.org>.

103 The data summary panel on the right side of the screen allows the reader to review model and data  
104 summaries and the portal update timeline. The data summary panel lists the number of PDTCs  
105 contributing data, the number of files uploaded by the PDTCs and available from the PDMR, the  
106 total number of models, and the number of cancer types represented in those models. Tabs allow  
107 the reader to review summary figures for PDX Models by cancer type and contributing PDTC,  
108 sequencing files by experimental strategy, ancestry, and the Portal Update Timeline.

## 109 **Resources**

110 The PDXNet Portal resources section includes pages that describe models, data (genomic,  
111 transcriptomic, and image), and analysis workflows made available on the CGC by the PDXNet  
112 consortium. The CGC based analysis workflows are a significant resource developed by the  
113 PDXNet community, allowing for reproducible and standardized analysis of PDX data<sup>8</sup>. The  
114 resource section also highlights data mirrored from the PDMR sequencing data repository to the  
115 CGC to support research activities. Lastly, we provide interactive plots and tables of sequencing  
116 data information for the PDXNet and PDMR sequencing data sets on the CGC. The PDXNet portal  
117 presents each resource (e.g., PDXNet, PDMR, workflows) on a separate page.

## 118 **PDXNet Models**

119 The PDXNet Portal Models tab summarizes verified model submissions to the PDMR made by  
120 each PDTC (Supplement Figure 1). The PDXNet models are a primary consortium deliverable.  
121 Each model submitted by a PDTC to the PDMR includes a completed model submission form that  
122 details the general PDX information, model-specific information, and tissue implantation details.  
123 Metadata are consistent with the PDX-MI and the PDMR data format. The metadata includes  
124 model id information to facilitate search and cross referencing to related PDMR models.

125 To date, PDXNet researchers have submitted 334 models to the PDMR across 33 cancer types.  
126 The most prevalent model cancer types include invasive breast carcinoma (30.8%, 103), melanoma  
127 (20.1%, 67), adenocarcinoma – colon (12.3%, 41), and adenocarcinoma – pancreas (7.8%, 26).  
128 See Table 2 for additional details.

## 129 **PDTC Sequencing Data**

130 The PDXNet Portal summarizes sequencing data submitted by the PDTCs for intraconsortium  
131 sharing and for public sharing (Figure 2). The PDXNet Data Collection - PDTC tab presents the  
132 core PDXNet sequencing data set. We processed submitted sequencing data with standardized  
133 workflows (e.g., whole exome capture; additional) according to a written standard operating  
134 procedure provided on the CGC. See the workflow section for description of the workflows used  
135 for standardized processing.

136 PDXNet researchers contributed 2,822 total sequencing files that include both whole-exome  
137 (80.7%, 2,278) and RNA-Seq (19.3%, 544) data. Six institutional contributors submitted 873  
138 samples from 307 patients. The sequencing sample types include PDX (51.6%, 1457), tumor (28.6,  
139 808), normal (17%, 480), and blood (2.7%, 76). The most prevalent diseases represented among  
140 the samples include breast (42.1%, 1,189), lung (12.8%, 362), pancreas (6.2%, 174), colon (5.8%,  
141 164). Metadata provided by centers did not include disease information for 18.2% (515) samples  
142 (see Table 3 for additional information).



143 **PDMR Sequencing Data**

144 The PDXNet Portal Model tab summarizes sequencing data transferred from the PDMR FTP  
145 server to the CGC as of August 2020 (Supplement Figure 2). The PDMR generates whole-exome  
146 and transcriptome sequencing data from models submitted according to tissue collection best  
147 practices and model quality control practices<sup>11</sup>. Molecular characterizations include whole-exome  
148 sequencing and gene expression profiling. We processed the PDMR sequencing data with  
149 standardized workflows as for the PDTC data.

150 The PDMR sequencing dataset on the CGC includes 9,492 paired-end sequencing files that include  
151 both whole-exome (52.8%, 5,012) and RNA-Seq (47.2%, 4,480) data (See Supplement Table 4).  
152 The data set includes 2,594 samples from 445 patients covering 34 disease types. The sequencing  
153 sample types include PDX (82.7%, 7,846), primary tumor (5.7%, 542), normal germline (5.5%,  
154 520), and organoid (3.2%, 304). The most prevalent diseases represented among the samples  
155 include colon (21.1%, 2,002), head and neck (11.6%, 1,102), soft tissue neoplasm (10.1%, 958),  
156 skin (8.7%, 828). Due to the size and cost associated with data transfers, synchronization between  
157 the PDMR sequencing database and the CGC dataset is done periodically. The PDMR data  
158 webpage has the most updated list of available PDMR sequencing data processed with  
159 standardized PDXNet workflows.

160 **PDMR Image data**

161 The PDXNet Portal Image tab summarizes hematoxylin-eosin stain (H&E) image data provided  
162 by the PDMR (Supplement Figure 3). The PDMR image data on the CGC includes 593 images  
163 scanned from PDX (93.8%, 556) and primary tumors (6.2%, 37). The images correspond to 593  
164 samples taken from 92 patients across 37 disease types. The PDX passages ranged from P0 to P6  
165 with the top four passages corresponding to P1(41.4%, 225), P2 (24.1%, 131), P0 (22.8%, 124),  
166 and P3 (8.3%, 45). The PDXNet Portal currently supports 43 metadata fields that data submitters  
167 can populate upon submission (See Supplement Table 1 for the complete list).

168 **Interactive Data Explorers**

169 The PDXNet Portal data explorer allows users to interactively create summary tables from the  
170 PDXNet and PDMR sequencing datasets (Supplement Figure 4). The interactive table supports 10  
171 table and chart types including simple tables, bar charts, line charts, and heat maps (see Supplement  
172 Table 1 for full list). Interactive tables also support 22 data summary options including count, sum,  
173 average, and variance (see Supplement Table 2 for the full list). The user drags and drops from 20  
174 metadata fields to the table type area to construct the table. Metadata field examples include  
175 contributor, sample type, experimental strategy, and passage (see Supplement Table 3 for complete  
176 list).

177 **PDXNet Workflows**

178 The PDXNet Portal Workflows tab summarizes analysis workflows developed by the PDXNet  
179 community (Supplement Figure 5). We selected workflows for standard consortium-wide data  
180 processing and public release from those submitted by each PDTC after benchmarking with  
181 simulated and experimentally derived PDX data<sup>8</sup>. Since the initial public release, we have  
182 restructured the workflows to efficiently process normal (tissue), tumor-only, and tumor-normal  
183 data. These workflows are implemented on the CGC using the Common Workflow Language  
184 (CWL)<sup>18</sup> with Docker containerized tools, which allows for easy sharing and analysis  
185 reproducibility. The PDXNet consortium developed a set of 15 workflows validated for processing

186 of both whole-exome and RNA-Seq data (Supplement Table 4). We are sharing these validated  
187 and tested workflows with the broader community via the CGC Public Apps Gallery  
188 (<https://cgc.sbggenomics.com/public/apps#q?search=pdx>). The use of CWL allows these  
189 workflows to be portable to any CWL-compliant execution environment. The workflows  
190 collectively facilitate the analysis of whole-exome or RNA-Seq data via mouse read  
191 disambiguation, read alignment, variant calling or transcript quantification, and sample and cohort  
192 level quality control. For whole-exome data, we also compute copy number variation (CNV),  
193 tumor mutational burden (TMB), microsatellite instability (MSI), and homologous recombination  
194 deficiency (HRD) during standardized processing. A full explanation of inputs, outputs, and data  
195 processing steps for each workflow is provided on the CGC in the respective description section.

## 196 **Analysis**

197 The PDXNet Portal analysis section includes several metrics derived from primary data sources  
198 and are described below in more detail. These results were generated from standard processing  
199 analysis workflows or through PDXNet research activities<sup>8</sup>, and we provide these analyses to  
200 support independent research by the broader research community.

### 201 **Ancestry Analysis**

202 The PDXNet Portal Ancestry Analysis page summarizes genetic ancestry analysis for datasets on  
203 the portal (Supplement Figure 6). We compute ancestry with SNPweight<sup>19</sup> using a reference  
204 dataset generated from the 1000 Genomes Project Phase III<sup>20</sup>. We classify each sample into one of  
205 five categories, which correspond roughly to the concept of “continental ancestry.”<sup>21</sup> These  
206 categories include European (EUR), African (AFR), American (AMR), East Asia (EAS), and  
207 South Asian (SAS). Samples that could not be confidently assigned to one of these categories are  
208 labeled Mixed (MIX). On the left side of the page, ancestry data filters allow the user to select the  
209 data contributors, ancestry, and disease type. Applying the selected filter to the data regenerates  
210 the two summary figures. The first summary figure is a bar chart that shows the ancestry  
211 distribution for the selected disease types. The second summary figure shows a pie chart with each  
212 slice corresponding to the ancestry types chosen. Supplement Table 6 shows the summary of  
213 ancestry estimation from PDX Models submitted to the PDMR.

### 214 **HRD-TMB-MSI Analysis**

215 The PDXNet Portal HRD-HSI-TMB analysis page allows the user to filter and summarize three  
216 computational metrics generated from whole-exome sequencing data by PDXNet standardized  
217 processing (Figure 3). The three computed metrics are Homologous Recombination Deficiency  
218 (HRD), Tumor Mutational Burden (TMB), and Microsatellite Instability (MSI). HRD is computed  
219 with ScarHRD<sup>22</sup> for matched normal data. TMB is calculated as the number of coding mutations  
220 that meet all quality criteria per Mb of the genome. Quality criteria are assessed using coverage,  
221 allele frequency, mapping quality, and strand bias. Variants included in the calculation are somatic  
222 and non-polymorphic, and are defined in SnpEff<sup>23</sup> as 'high' or 'moderate' functional impact. As  
223 only a portion of the genome was sequenced, genome coverage (Mb) is calculated from the input  
224 target coverage BED file. MSI is calculated with MANTIS<sup>24</sup> for samples with matched normal  
225 data, and calculated with MSIsensor<sup>25</sup> for tumor-only samples. For each metric, users can set data  
226 filters for the visualizations. The data filters, on the left side of the page, allow the user to select  
227 data contributor, sample type, experimental strategy, and disease type. Applying the selected filter  
228 to the data generates a boxplot chart displaying the selected metrics for each disease type chosen  
229 (Figure 3).

### 230 **Tumor Volume Analysis**

231 The PDXNet Portal Tumor Volume Analysis Page allows the user to visualize raw tumor volume  
232 growth data provided by the PDMR (Figure 4). The filters enable the user to select contributor,  
233 treatment, and disease type on the page's left side. Applying the selected filter to the data  
234 regenerates the Tumor Volume and the Tumor Disease Types figure tabs. The currently available  
235 volume data is from 75 models representing 30 disease types, which were treated with seven  
236 possible agents (Supplement Table 7). The dataset has 17,920 volume measures from 89 treatment  
237 studies. The Tumor Volume tab allows the user to choose plot level (Animal and Treatment Arm)  
238 and plot pattern (multiple and combined), reorganizing the plots to correspond to select values.  
239 The Tumor Disease type tab plots a disease pie chart based on user selection (Figure 4).

### 240 **Quality Control Analysis**

241 The PDXNet Portal QC Analysis page provides plots and tabular results for selected QC metrics  
242 (Supplement Figure 7). The page displays QC metrics generated during the standardized data  
243 processing procedure for each relevant data type. The page provides sub-tabs showing whole-  
244 exome and RNA-Seq quality control metrics for a selected dataset PDXNet or PDMR. The whole-  
245 exome tabs plot mean target coverage, percent target bases with greater than 20% coverage, and  
246 percent duplication by data contributor. The RNA-Seq tabs plot percent usable bases, percent  
247 ribosomal bases, and percent correct strand reads. The plotted metrics, along with additional QC  
248 metrics are available in a table at the bottom of the page.

### 249 **Tools**

250 The PDXNet Portal tools section includes several Portal specific tools developed to support present  
251 and future PDXNet and other independent general research activities.

### 252 **Workflow Cost prediction**

253 The Workflow cost prediction tool allows users to estimate the cost of processing their samples on  
254 the CGC with the PDXNet workflows. This tool uses prediction models (gradient boosting trees<sup>26</sup>)  
255 generated from 7,000 workflow runs. The user can select either whole-exome or RNA-Seq  
256 workflows and provide the number and optionally size of files to process. The calculator computes  
257 the storage and computation cost for processing the user defined dataset. The estimated costs  
258 assume the workflows were run on the CGC using spot instances. We expect the tool to allow  
259 users to estimate data storage and computational cost for their own analyses allowing for  
260 estimating grant budgets and budgeting lab expenses.

### 261 **PDX Minimum Information Metadata – Creation**

262 The generate metadata tab allows users to interactively generate a PDX minimum information  
263 metadata sheet (PDX-MI). As described above, the PDXFinder working group developed the  
264 PDX-MI as a standard for exchanging PDX information among institutions. The generate metadata  
265 tab allows the user to create a PDX-MI spreadsheet by stepping through data entry dialog boxes.  
266 The interface supports entry of patient information, treatment information, tumor information,  
267 model, and sequencing metadata. The user downloads the spreadsheet upon data entry completion,  
268 and no information is stored permanently on the PDXNet Portal site.

### 269 **PDX Minimum Information Metadata – Validation**

270 The validate metadata tab allows users to upload and validate a PDX-MI metadata spreadsheet.  
271 The user can review uploaded contents at the bottom of the page. The validation verifies that



272 required metadata fields are present and that entries are valid. The validation feature generates a  
273 summary of required fields that includes percent completed and most common data entry per field.  
274 The validation feature reduces the amount of time necessary to review and check submitted PDX-  
275 MI spreadsheets.

## 276 **Implementation**

277 The backend of the PDXNet Portal is an R-Shiny app hosted on a cloud-based server. The portal  
278 uses the PDMR and PDX-MI metadata standards. The PDMR and PDX-MI standards allow us to  
279 harmonize data across sources, quickly import data from the PDMR and other data sources, and  
280 exchange information with other PDX related portals. We also collect additional metadata required  
281 to facilitate computation on the CGC, including omics-related information. We use the Cancer  
282 Therapy Evaluation Program (CTEP) disease classification to standardize disease entries although  
283 we initially accepted institutionally-defined disease classification. In the cases where a standard  
284 does not exist; we collect sufficient metadata required to display and process the data source. For  
285 example, we take a minimalistic approach to managing tumor volume and H&E image data.  
286 Several PDXNet teams are working towards the development of best practices for these data types.  
287 Until these best practices are published, we will evolve these operational standards to support  
288 harmonization and analysis.

289 The PDXNet Portal team updates information on the portal semi-automatically using the same  
290 data model as the PDMR, allowing PDXNet to sync with PDMR model information. The PDMR  
291 provides regular updates to PDXNet on PDTC model submissions to update the PDX Model's  
292 page. We receive sequencing data upload updates from the PDTCs and the PDMR, and we have  
293 developed scripts for extracting PDXNet standardized processing results, allowing for quality  
294 control information and computational metrics to be tabulated for semi-automated PDXNet Portal  
295 updates. The PDXNet Portal source code will not be made publicly available for security reasons.  
296 Future PDXNet Portal versions will support controlled access sign-in to provide links to controlled  
297 files.

## 298 **Data Availability**

299 Each PDXNet Portal data tab allows users to download metadata. Data for smaller data types such  
300 as tumor volume data and computed metrics (ex. HRD and TMB) can be downloaded directly  
301 from the portal. For larger data types, please request data from the PDXNet Portal's Contact page.  
302 We will coordinate with PDTCs to make data available either directly or through dbGaP as  
303 required by the PDXNet data sharing agreement.

## 304 **Discussion**

305 The PDXNet Portal is a vital component of the PDXNet consortium. The portal establishes a  
306 mechanism for public discovery of consortium-generated resources including models, data, and  
307 workflows. The portal allows researchers to examine the data, models, and metadata using  
308 integrated query features. These portal capabilities facilitate cancer data discovery, a core goal of  
309 the NCI Cancer Moonshot program. Additionally, the PDXNet Portal allows the consortium to  
310 manage data analysis projects by clarifying which data are available, their source, their quality,  
311 and their suitability for research projects and scientific questions. Within the PDXNet consortium,  
312 the PDXNet Portal functions as a centralized source of information for the status of the available

313 models. The standardized sequence processing, quality control, and computation of common  
314 metrics (e.g., MSI, TMB, HRD, and genetic ancestry) further enhance data analysis, model use,  
315 prioritization of future models and data collection.

316 Enhancement of collaboration between researchers is a main objective of the PDXNet Portal. To  
317 accomplish this, we are integrating the PDXNet Portal and PDXNet data with existing NCI, NIH,  
318 and NCBI infrastructure. All data visible on the PDXNet Portal will also be available through the  
319 Cancer Data Service (CDS)<sup>17</sup> through dbGaP<sup>27</sup> access. Accessing PDXNet data on the Cancer  
320 Genomics Cloud<sup>28</sup> allows users to perform sophisticated analyses utilizing cloud computing within  
321 an integrated bioinformatics ecosystem. By co-locating data and analysis, as well as integrating  
322 data management, this infrastructure can decrease the time required for researchers to perform  
323 analyses.

324 For large consortia such as PDXNet, metadata and secondary data types are often just as important  
325 as sequencing data for supporting impactful research. Examples of these additional data types  
326 include high-resolution images and tumor volume/drug response data. These data extend the types  
327 of problems researchers can address. We expect that the portal's image and tumor volume  
328 functionality will expand as these datasets grow. Future iterations of the portal will include  
329 interactive exploration across data types allowing users to address complex research problems.

330 PDX models are widely used in cancer research, but there remain challenges in standards for data  
331 submission, access, and quality. The PDXNet Portal reflects PDXNet activities to implement such  
332 standards not only for sequencing data but also metadata and secondary data types. Another  
333 consideration requiring careful implementation is to balance data security versus ease of use. The  
334 PDXNet Portal will grow with new data and features as the PDXNet consortium continues to  
335 generate new models. Consequently, standardized processing and batch effects are of increasing  
336 concern for downstream analyses. To ensure that researchers have confidence in the data quality,  
337 we will continue to share the informative metrics computed by the standardized PDXNet quality  
338 control workflows.

339 Several key features are the focus for the next iteration of the PDXNet Portal. These include tools  
340 to search for commonly found genomic variants (ex. SNPs, INDELs, and copy number variations)  
341 within models, diseases and genes of interest, and interactive exploration of gene expression data.  
342 These tools would enable researchers to perform meaningful analyses directly from the portal and  
343 more rapidly realize value from PDXNet data. Visualization and analysis of associated data,  
344 including imaging and tumor volume/drug response data, will also be a focus. These data types  
345 have the potential for high impact, particularly given the innovation in large scale data  
346 visualization techniques in many fields.

347 Further development of links between the PDXNet Portal and NCI computational infrastructure  
348 will benefit researchers as well. Moving large quantities of data is time-consuming and can be  
349 expensive. Enabling researchers to perform their analysis where the data is already present lowers  
350 the entry barrier into the computational analysis of PDX model data. To facilitate these links, we  
351 envision users will be able to create cohorts for analysis using the PDXNet Portal and transferring  
352 that selection to the Cancer Genomics Cloud or other computational platform, where they will be  
353 able to easily take advantage of well-developed computational infrastructure.

354 We will extend PDXNet Portal capabilities as the size and complexity of PDXNet datasets grow.  
355 These enhancements will allow the research community to quickly find and evaluate PDXNet  
356 resources to supplement their research studies. We will continue to improve the PDXNet Portal  
357 value by collaborating with related PDX initiatives, including the PDMR, PDXFinder, and  
358 EuroPDX. Such collaborations will demonstrate how to effectively conduct studies across  
359 institutions, providing examples for the broader research community in how to optimize their PDX  
360 studies with respect to the public PDX models and datasets that are becoming increasingly  
361 available.

## 362 **Acknowledgments**

363 We would like to thank the patients who provided the tissues that support the PDXNet model and  
364 sequencing data generation.

365 This work was supported by NIH funding to the PDXNet Data Commons and Coordination Center  
366 (NCI U24-CA224067) to the PDX Development and Trial Centers (NCI U54-CA224083, NCI  
367 U54-CA224070, NCI U54-CA224065, NCI U54-CA224076, NCI U54-CA233223, and NCI U54-  
368 CA233306). The Cancer Genomics Cloud powered by Seven Bridges is a Cancer Research Data  
369 Commons Cloud Resource, funded in whole or in part with Federal funds from the National Cancer  
370 Institute, National Institutes of Health, Contract No. HHSN261201400008C and ID/IQ Agreement  
371 No. 17X146 under Contract No. HHSN261201500003I and 75N91019D00024.

372

373

374

375

## 376 **References**

- 377 1. Koga, Y. & Ochiai, A. Systematic Review of Patient-Derived Xenograft Models for  
378 Preclinical Studies of Anti-Cancer Drugs in Solid Tumors. *Cells* **8**, 418 (2019).
- 379 2. Dobrolecki, L., Airhart, S., Alferez, D. & Aparicio, S. Patient-derived Xenograft (PDX)  
380 models in basic and translational breast cancer research. *Cancer Metastasis Rev.* **35**, 547–  
381 573 (2016).
- 382 3. Collins, A. T. & Lang, S. H. A systematic review of the validity of patient derived  
383 xenograft (PDX) models: The implications for translational research and personalised  
384 medicine. *PeerJ* **2018**, 1–22 (2018).
- 385 4. Brown, K. M. *et al.* Patient-derived xenograft models of colorectal cancer in preclinical  
386 research: A systematic review. *Oncotarget* **7**, 66212–66225 (2016).
- 387 5. Grandori, C. & Kemp, C. Personalized cancer models for target discovery and precision  
388 medicine. *Trends Cancer* **4**, 634–642 (2018).
- 389 6. Hidalgo, M. *et al.* Patient-Derived Xenograft Models: An Emerging Platform for  
390 Translational Cancer Research. *Cancer Discovery* **4**, 998–1013 (2014).
- 391 7. Woo, X. Y. *et al.* Genomic data analysis workflows for tumors from patient-derived  
392 xenografts (PDXs): Challenges and guidelines. *BMC Medical Genomics* **12**, 1–19 (2019).
- 393 8. Evrard, Y. A. *et al.* Systematic establishment of robustness and standards in patient-  
394 derived xenograft experiments and analysis. *Cancer Research* **80**, 2286–2297 (2020).
- 395 9. Sun, H. *et al.* Comprehensive characterization of 536 patient-derived xenograft models  
396 prioritizes candidates for targeted treatment. *Nature Communications* **12**, (2021).
- 397 10. Woo, X. Y. *et al.* Conservation of copy number profiles during engraftment and passaging  
398 of patient-derived cancer xenografts. *Nature Genetics* **53**, 86–99 (2021).
- 399 11. The NCI Patient-Derived Models Repository (PDMR). *Research, NCI-Frederick:*  
400 *Frederick National Laboratory for Cancer* <https://pdmr.cancer.gov/> (2021).
- 401 12. Conte, N. *et al.* PDX Finder: A portal for patient-derived tumor xenograft model  
402 discovery. *Nucleic Acids Research* **47**, D1073–D1079 (2019).
- 403 13. Meehan, T. F. *et al.* PDX-MI: Minimal information for patient-derived tumor xenograft  
404 models. *Cancer Research* **77**, e62–e66 (2017).
- 405 14. Lowy, D. & Collins, F. Aiming High - Changing the Trajectory for Cancer. *NEJM* **374**,  
406 1901–1904 (2016).
- 407 15. Sharpless, N. E. & Singer, D. S. Progress and potential: the Cancer Moonshot. *Cancer*  
408 *Cell* 1–6 (2021) doi:10.1016/j.ccell.2021.04.015.
- 409 16. Lau, J. W. *et al.* The cancer genomics cloud: Collaborative, reproducible, and  
410 democratized - A new paradigm in large-scale computational research. *Cancer Research*  
411 **77**, e3–e6 (2017).
- 412 17. NCI. Cancer Data Service. <https://datacommons.cancer.gov/repository/cancer-data-service>  
413 (2021).
- 414 18. Amstutz, P., Crusoe, M. & Tijjanic, N. *Common Workflow language (CWL) Workflow*  
415 *Description, v1.0.2.* (2016).
- 416 19. Chen, C. Y. *et al.* Improved ancestry inference using weights from external reference  
417 panels. *Bioinformatics* **29**, 1399–1406 (2013).

- 418 20. Auton, A. *et al.* A global reference for human genetic variation. *Nature* **526**, 68–74  
 419 (2015).  
 420 21. Weiss, K. M. & Long, J. C. Non-Darwinian estimation: My ancestors, my genes’  
 421 ancestors. *Genome Research* **19**, 703–710 (2009).  
 422 22. Sztupinski, Z. *et al.* Migrating the SNP array-based homologous recombination  
 423 deficiency measures to next generation sequencing data of breast cancer. *npj Breast*  
 424 *Cancer* **4**, 8–11 (2018).  
 425 23. Cingolani, P. *et al.* A program for annotating and predicting the effects of single  
 426 nucleotide polymorphisms, SnpEff: SNPs in the genome of *Drosophila melanogaster*  
 427 strain w1118; iso-2; iso-3. *Fly* **6**, 80–92 (2012).  
 428 24. Kautto, E. A. *et al.* Performance evaluation for rapid detection of pan-cancer  
 429 microsatellite instability with MANTIS. *Oncotarget* **8**, 7452–7463 (2017).  
 430 25. Niu, B. *et al.* MSIensor: Microsatellite instability detection using paired tumor-normal  
 431 sequence data. *Bioinformatics* **30**, 1015–1016 (2014).  
 432 26. Hastie, T., Tibshirani, R. & Friedman, J. Boosting and Additive Trees. in *The Elements of*  
 433 *Statistical Learning* (Springer, 2009).  
 434 27. Mailman, M. D. *et al.* The NCBI dbGaP database of genotypes and phenotypes. *Nature*  
 435 *Genetics* **39**, 1181–1186 (2007).  
 436 28. Lau, J. W. *et al.* The cancer genomics cloud: Collaborative, reproducible, and  
 437 democratized - A new paradigm in large-scale computational research. *Cancer Research*  
 438 **77**, e3–e6 (2017).  
 439

440 **Table 1. PDXNet Development and Trial Centers (PDTC) and the PDX Data Commons**  
 441 **and Coordinating Center (PDCCC)**

| PDXNet                                           |                                                          |
|--------------------------------------------------|----------------------------------------------------------|
| <b>PDX Development and Trials Centers (PDTC)</b> |                                                          |
| HCI-BCM*                                         | Huntsman Cancer Institute and Baylor College of Medicine |
| MDACC                                            | MD Anderson Cancer Center                                |
| WUSTL*                                           | Washington University at St. Louis                       |
| WISTAR*                                          | Wistar Institute and MD Anderson Cancer Center           |
| BCM&                                             | Baylor College of Medicine                               |
| UCDAVIS&                                         | The University of California at Davis                    |
| <b>PDX Data Commons and Coordinating Center</b>  |                                                          |
| JAX-SB*&                                         | Jackson Laboratory and Seven Bridges                     |

\* NCI Cancer Therapy Evaluation Program Funding

& NCI Center to Reduce Cancer Health Disparities Funding

442

443



444 **Table 2. PDX models generated by PDX Development and Trials Centers**

|                              | HCI-BCM   | MDACC      | WUSTL     | Wistar    | UC Davis  | BCM       | Totals     |
|------------------------------|-----------|------------|-----------|-----------|-----------|-----------|------------|
| Breast                       | 78        | 12         | 2         | 0         | 0         | 16        | 108        |
| Head and Neck                | 0         | 0          | 2         | 0         | 0         | 0         | 2          |
| Digestive/Gastrointestinal   | 0         | 50         | 44        | 0         | 3         | 0         | 97         |
| Endocrine and Neuroendocrine | 0         | 2          | 0         | 0         | 0         | 0         | 2          |
| Musculoskeletal              | 0         | 1          | 4         | 0         | 0         | 0         | 5          |
| Respiratory/Thoracic         | 0         | 30         | 1         | 0         | 2         | 0         | 33         |
| Skin                         | 0         | 3          | 2         | 63        | 0         | 0         | 68         |
| Genitourinary                | 0         | 0          | 5         | 0         | 10        | 0         | 15         |
| Gynecologic                  | 0         | 3          | 0         | 0         | 0         | 0         | 3          |
| Unknown Primary              | 0         | 0          | 0         | 1         | 0         | 0         | 1          |
| <b>total</b>                 | <b>78</b> | <b>101</b> | <b>60</b> | <b>64</b> | <b>15</b> | <b>16</b> | <b>334</b> |

*HCI-BCM*: Huntsman Cancer Institute and Baylor College of Medicine, *MDACC*: MD Anderson Cancer Center, *WUSTL*: Washington University at St. Louis, *Wistar*: The Wistar Institute, *UC Davis*: University of California Davis, *BCM*: Baylor College of Medicine

445

446

447 **Table 3. Sequencing data files generated by PDX Development and Trial Centers**

|                                   | <b>Overall</b><br>N=2822 | <b>BCM-HCI</b><br>N= 1099 | <b>MDACC</b><br>N=418 | <b>UC Davis</b><br>N=48 | <b>WISTAR</b><br>N= 382 | <b>WUSTL</b><br>N= 875 |
|-----------------------------------|--------------------------|---------------------------|-----------------------|-------------------------|-------------------------|------------------------|
| <b>Experimental Strategy n(%)</b> |                          |                           |                       |                         |                         |                        |
| RNA-Seq                           | 544 (19%)                | 102 (9%)                  | 6 (1%)                | 32 (67%)                | 144(38%)                | 260(30%)               |
| WES                               | 2,278 (81%)              | 997 (91%)                 | 412 (99%)             | 16 (33%)                | 238(62%)                | 615(70%)               |
| <b>Disease Type, n(%)</b>         |                          |                           |                       |                         |                         |                        |
| Bladder                           | 100(3.5%)                | 2(<0.2%)                  | 0(0%)                 | 48(100%)                | 0(0%)                   | 50(5.7%)               |
| Blood                             | 84(3.0%)                 | 0(0%)                     | 84(20%)               | 0(0%)                   | 0(0%)                   | 0(0%)                  |
| Bone                              | 8(0.3%)                  | 0(0%)                     | 0(0%)                 | 0(0%)                   | 0(0%)                   | 8(0.9%)                |
| Breast                            | 1189(42%)                | 985(90%)                  | 0(0%)                 | 0(0%)                   | 0(0%)                   | 204(23%)               |
| Colon                             | 164(5.8%)                | 4(0.4%)                   | 0(0%)                 | 0(0%)                   | 0(0%)                   | 160(18%)               |
| Gastrointestinal                  | 22(0.8%)                 | 0(0%)                     | 0(0%)                 | 0(0%)                   | 0(0%)                   | 22(2.5%)               |
| Head and Neck                     | 26(0.9%)                 | 2(<0.2%)                  | 0(0%)                 | 0(0%)                   | 0(0%)                   | 24(2.7%)               |
| Kidney                            | 58(2.1%)                 | 0(0%)                     | 0(0%)                 | 0(0%)                   | 0(0%)                   | 58(6.6%)               |
| Lung                              | 362(13%)                 | 0(0%)                     | 320(77%)              | 0(0%)                   | 0(0%)                   | 42(4.8%)               |
| Neuroendocrinal                   | 2(<0.1%)                 | 0(0%)                     | 2(0.5%)               | 0(0%)                   | 0(0%)                   | 0(0%)                  |
| Ovarian                           | 8(0.3%)                  | 0(0%)                     | 0(0%)                 | 0(0%)                   | 0(0%)                   | 8(0.9%)                |
| Pancreas                          | 174(6.2%)                | 0(0%)                     | 0(0%)                 | 0(0%)                   | 0(0%)                   | 174(20%)               |
| Rectum                            | 22(0.8%)                 | 0(0%)                     | 0(0%)                 | 0(0%)                   | 0(0%)                   | 22(2.5%)               |
| Skin                              | 32(1.1%)                 | 0(0%)                     | 0(0%)                 | 0(0%)                   | 0(0%)                   | 32(3.7%)               |
| Soft Tissue Neoplasm              | 56(2.0%)                 | 0(0%)                     | 0(0%)                 | 0(0%)                   | 0(0%)                   | 56(6.4%)               |
| Unknown                           | 515(18%)                 | 106(10%)                  | 12(2.9%)              | 0(0%)                   | 382(100%)               | 15(1.7%)               |
| <b>Sample Type, n(%)</b>          |                          |                           |                       |                         |                         |                        |
| Normal                            | 481(17%)                 | 121(11%)                  | 142(34%)              | 0(0%)                   | 0(0%)                   | 218(25%)               |
| PDX                               | 1,497(52%)               | 594(54%)                  | 146(35%)              | 0(0%)                   | 202(53%)                | 515(59%)               |
| Tumor                             | 884(31%)                 | 384(35%)                  | 130(31%)              | 48(100)                 | 180(47%)                | 142(16%)               |

*HCI-BCM*: Huntsman Cancer Institute and Baylor College of Medicine, *MDACC*: MD Anderson Cancer Center, *WUSTL*: Washington University at St. Louis, *Wistar*: The Wistar Institute, *UC Davis*: University of California Davis, *BCM*: Baylor College of Medicine

448

449

450 **Figures**

451

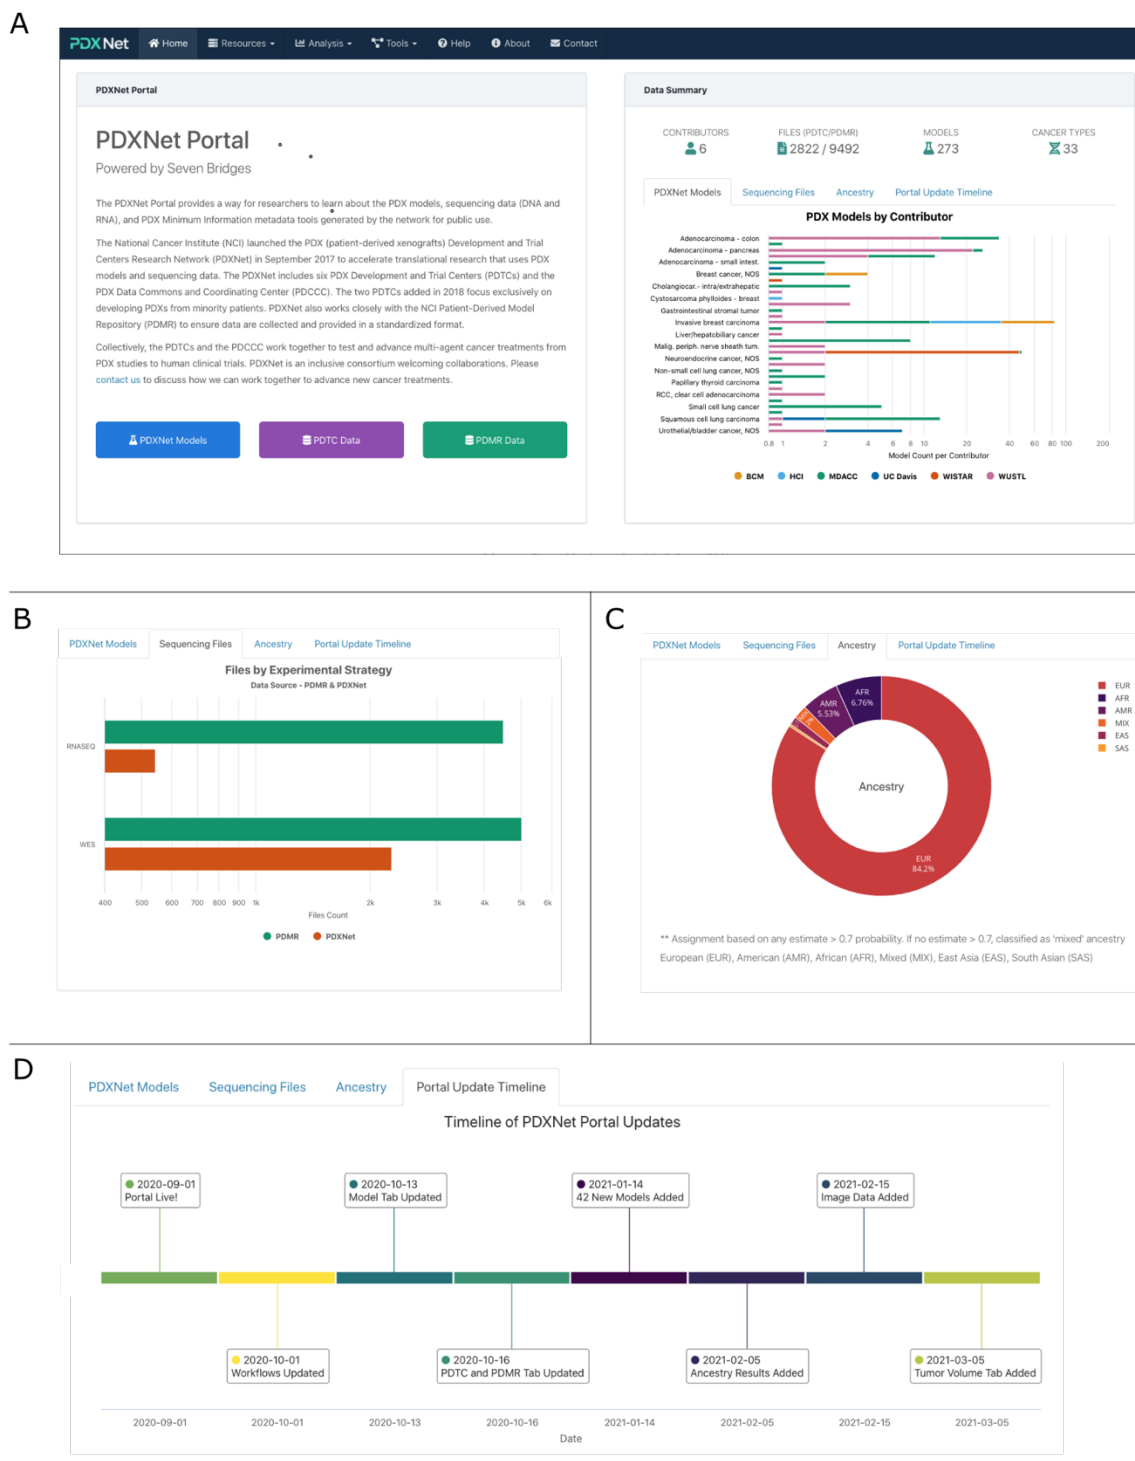

452

453 **Figure 1. PDXNet Portal Landing Page**

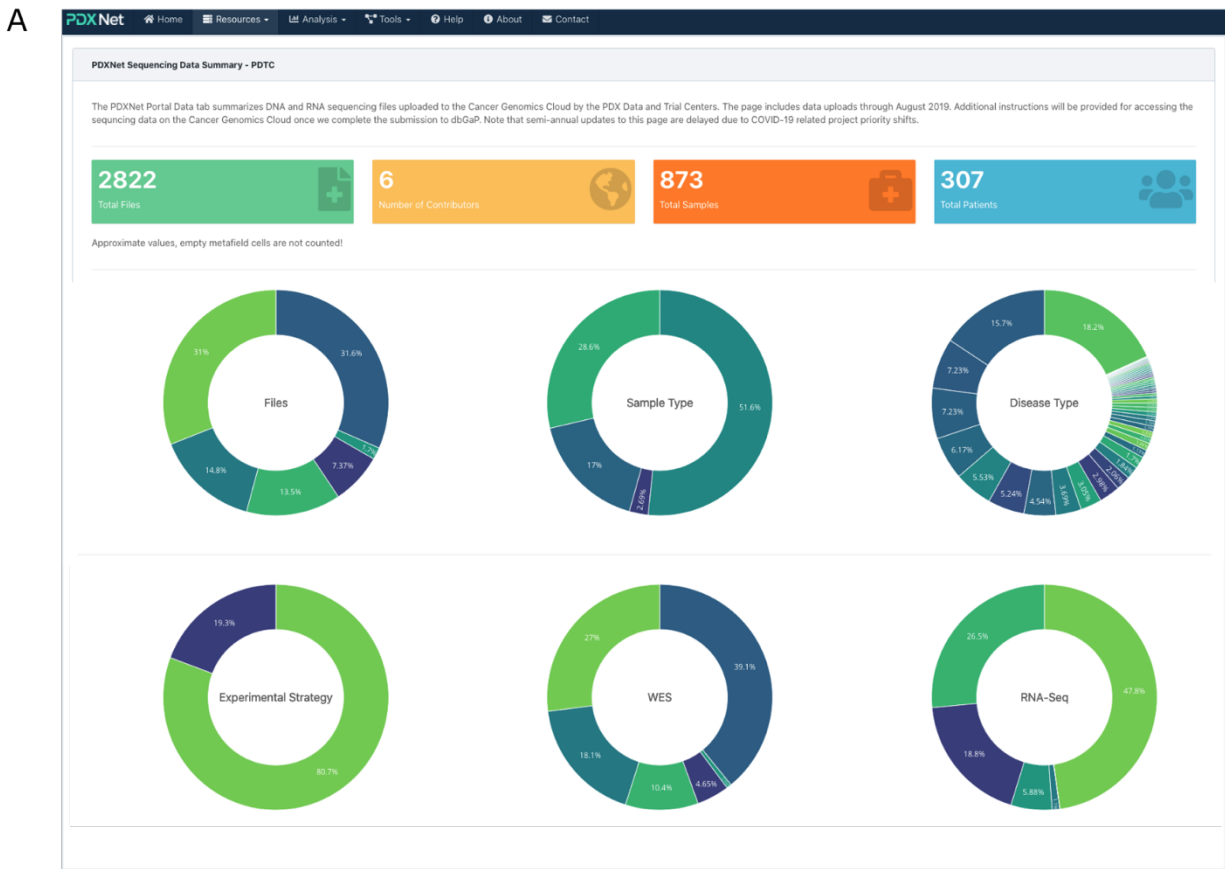

**B**

**Metadata**

Column visibility Copy Print Download

Show 5 entries

Search:

| contributor | file_name                                   | patient_id | model_id | tumor_id    | case_id | sample_id | sample_type | experimental_strategy | gender | paired_end | capture_kit      | capture_assembly | availability | public |
|-------------|---------------------------------------------|------------|----------|-------------|---------|-----------|-------------|-----------------------|--------|------------|------------------|------------------|--------------|--------|
| AI          | All                                         | /          |          |             |         | /         | All         | All                   |        | A          | AI               | All              | A            |        |
| 1           | BCM_LZML_37246_NoIndex_L00X_R1_001.fastq.gz | 24452      | BCM-0002 | 2011012-2   |         | BCM-0002  | PDX         | RNA-Seq               | Female | 1          | Nugen Ovation v2 |                  | PDXNet       | Yes    |
| 2           | BCM_LZML_37246_NoIndex_L00X_R2_001.fastq.gz | 24452      | BCM-0002 | 2011012-2   |         | BCM-0002  | PDX         | RNA-Seq               | Female | 2          | Nugen Ovation v2 |                  | PDXNet       | Yes    |
| 3           | BCM_ML6065_GATCAGCG_L00X_R1_001.fastq.gz    | 2219       | BCM-0046 | 2011012-46  |         | BCM-0046  | PDX         | RNA-Seq               | Female | 1          | Nugen Ovation v2 |                  | PDXNet       | Yes    |
| 4           | BCM_ML6065_GATCAGCG_L00X_R2_001.fastq.gz    | 2219       | BCM-0046 | 2011012-46  |         | BCM-0046  | PDX         | RNA-Seq               | Female | 2          | Nugen Ovation v2 |                  | PDXNet       | Yes    |
| 5           | BCM_ML6061_CAGATCTG_L00X_R1_001.fastq.gz    | 24561      | BCM-0104 | 2011012-104 |         | BCM-0104  | PDX         | RNA-Seq               | Female | 1          | Nugen Ovation v2 |                  | PDXNet       | Yes    |

Showing 1 to 5 of 2,822 entries

Previous 1 2 3 4 5 ... 565 Next

454

455

**Figure 2. PDXNet sequencing data page on the PDXNet portal**

456

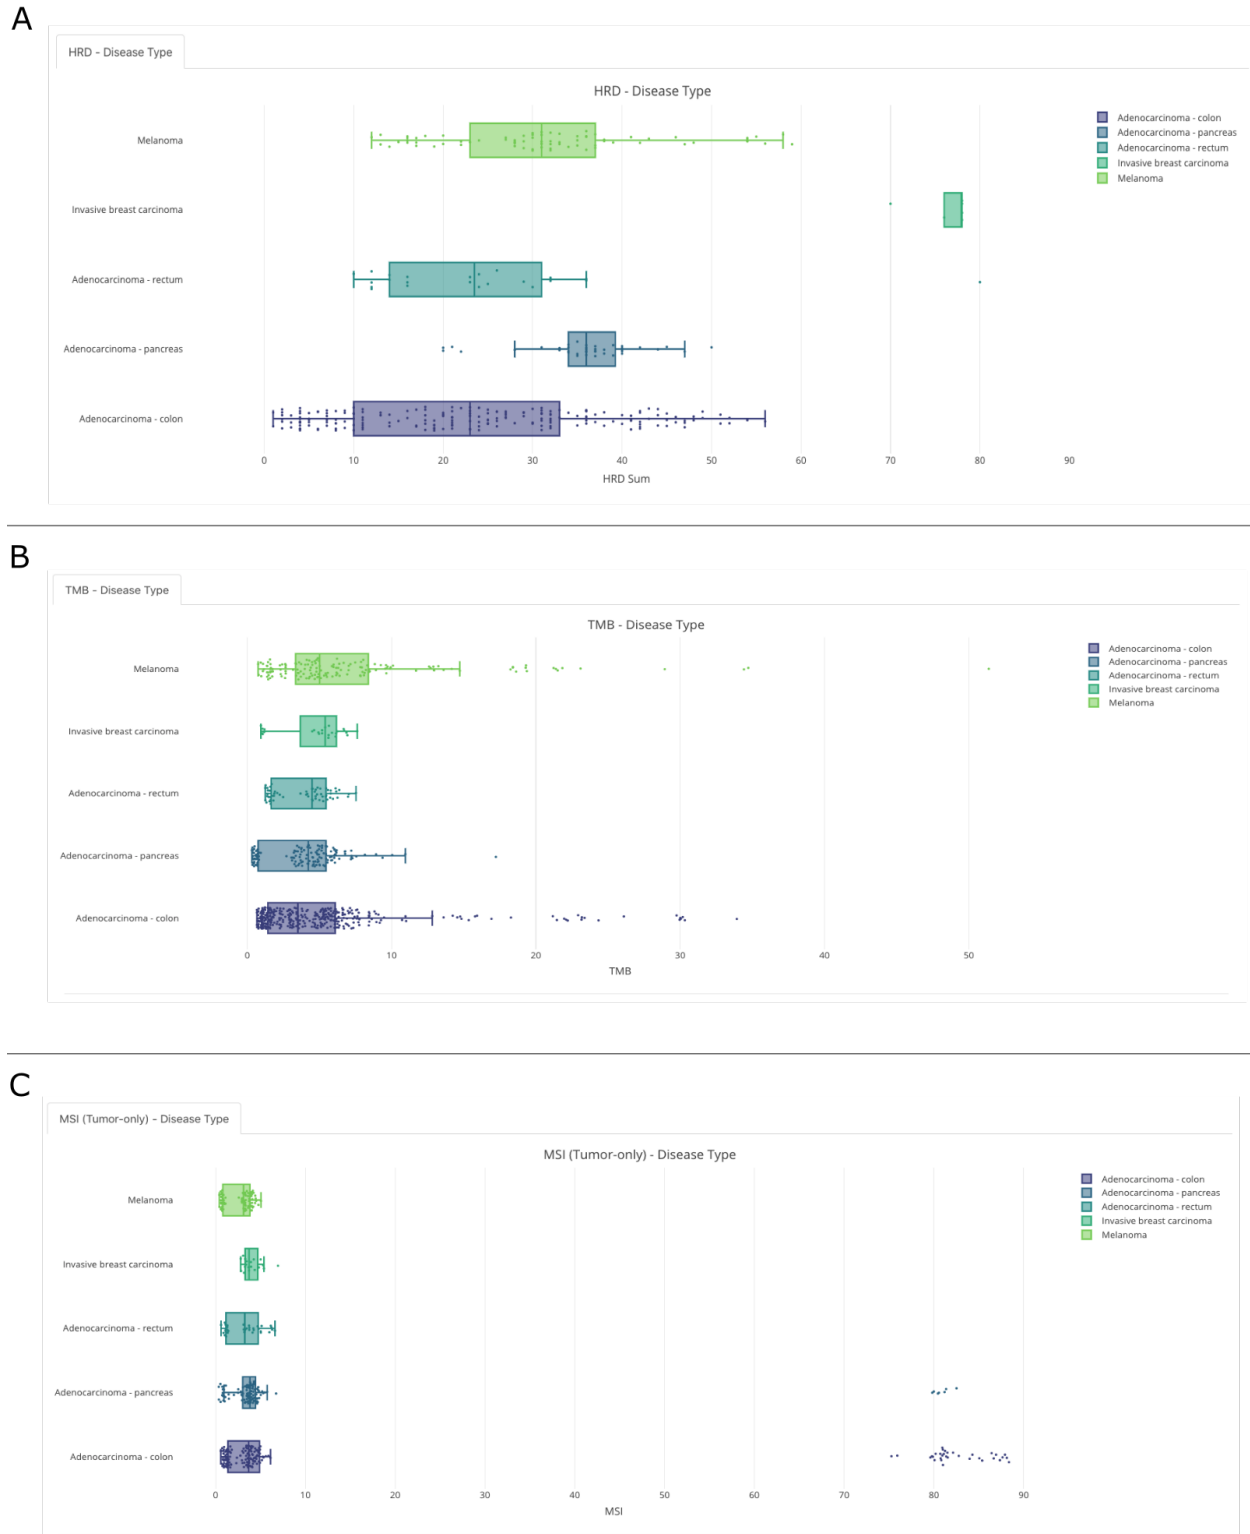

457  
458  
459

**Figure 3. Examples figures generated from the HRD-TMB-MSI page on the PDXNet Portal**



A

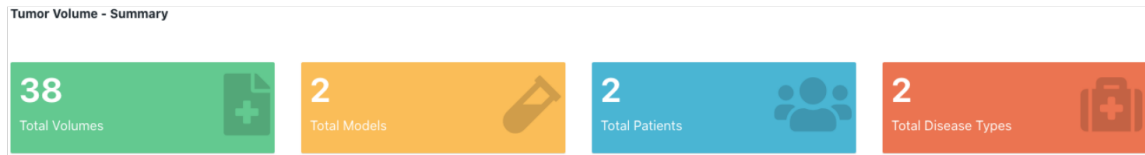

B

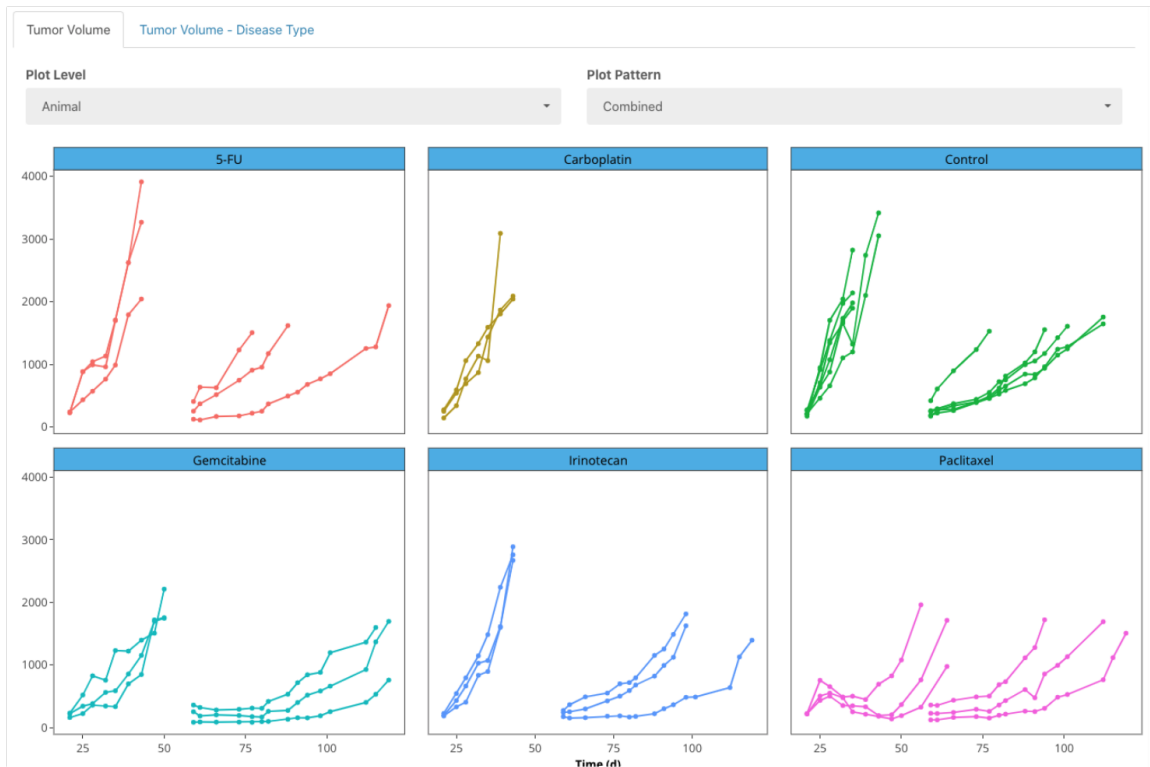

C

**Tumor Volume - Data Table**

Column visibility Copy Print Download

Search:

Show 5 entries

| Contributor | Patient_ID | ModelName | ExpNameCSV   | AgentName | EXP_NBR | GROUP_NBR | ANIMAL_NBR | ID | OBS_DAY | TUMO |
|-------------|------------|-----------|--------------|-----------|---------|-----------|------------|----|---------|------|
| All         | All        | All       | All          | All       | A       | All       | All        |    | All     | All  |
| 1           | PDMR       | 218243    | 218243-119-R | ZDRJ2-1   | Control | 120       | 1          | 1  | 120-1-1 | 59   |
| 2           | PDMR       | 218243    | 218243-119-R | ZDRJ2-1   | Control | 120       | 1          | 1  | 120-1-1 | 61   |
| 3           | PDMR       | 218243    | 218243-119-R | ZDRJ2-1   | Control | 120       | 1          | 1  | 120-1-1 | 66   |
| 4           | PDMR       | 218243    | 218243-119-R | ZDRJ2-1   | Control | 120       | 1          | 1  | 120-1-1 | 73   |
| 5           | PDMR       | 218243    | 218243-119-R | ZDRJ2-1   | Control | 120       | 1          | 1  | 120-1-1 | 77   |

Showing 1 to 5 of 355 entries

Previous 1 2 3 4 5 ... 71 Next

460

461

**Figure 4. Tumor volume data page on the PDXNet Portal**

462

## 463 **Figure Legend**

### 464 **Figure 1. PDXNet Portal Landing Page**

465 Views from the PDXNet Portal Landing Page. **(A)** The initial PDXNet Portal Landing Page. **(B)**  
466 Experimental strategies (whole-exome and RNA-Seq) for the PDXNet (green) and PDMR (red)  
467 sequencing datasets. **(C)** Computed ancestry in a pie chart. Ancestry is classified in the following  
468 categories: European (EUR-Red), African (AFR-Blue), American (AMR-Purple), Mixed (MIX-  
469 Orange), East Asian (EAS-Light Purple), South Asian (SAS-Yellow). **(D)** Major portal updates in  
470 a timeline starting in September of 2019 through March 2021.

### 471 **Figure 2. PDXNet sequencing data page on the PDXNet Portal**

472 Components of the PDXNet sequencing data page. **(A)** Panel shows summary statistics including  
473 number of sequencing files (green), contributors (yellow), total samples (orange), and total patients  
474 (blue). Also, shown are donut plots for contributors, sample types, disease type, experimental  
475 strategy, WES contributors, and RNA-Seq contributors. **(B)** Panel shows metadata for the PDXNet  
476 sequencing data in a spreadsheet format. The interface supports searching and sorting metadata.  
477 Users can copy, print, and download metadata into accessible formats.

### 478 **Figure 3. Examples figures generated from the HRD-TMB-MSI page on the PDXNet Portal**

480 Plots generated on the PDXNet Portal HRD-TMB-MSI page **(A)** Plot of Homologous  
481 Recombination Deficiency (HRD) computed from sequencing data provided by PDXNet  
482 researchers. The plot shows HRD by disease type **(B)** Plot of Tumor Mutational Burden (TMB)  
483 computed from sequencing data provided by PDXNet researchers. The plot shows TMB by disease  
484 type. **(C)** Plot of TMB computed from sequencing data provided by PDXNet researchers, by  
485 disease type.

### 486 **Figure 4. Tumor volume data page on the PDXNet Portal**

487 Components of the PDXNet tumor volume page. The figure shows a filtered dataset. **(A)** Panel  
488 shows summary statistics including number tumor volume datasets (green), number of models in  
489 the selected dataset (yellow), total number of patients (blue), and total number of diseases  
490 represented (red). **(B)** Panel shows the tumor volume data organized by the treatment arm. The  
491 user can control plot level (animal or treatment arm) and plot pattern (multiple or combined)

492 **Supplementary Materials**

493

494 **PDXNet Consortium Members**

495

496 Matthew Bailey <sup>1</sup>, Emilio Cortes-Sanchez <sup>1</sup>, Lacey E. Dobrolecki <sup>1</sup>, Sandra Scherer <sup>1</sup>, Chieh-  
497 Hsiang Yang <sup>1</sup>, Maihi Fujita <sup>1</sup>, Zhengtao Chu <sup>1</sup>, Ling Zhao <sup>1</sup>, Andrew Butterfield <sup>1</sup>, Argun  
498 Akcakanat <sup>2</sup>, Gao Boning <sup>2</sup>, Kurt Evans <sup>2</sup>, Bingliang Fang <sup>2</sup>, Don Gibbons <sup>2</sup>, Vanessa Jensen <sup>2</sup>,  
499 Dara Keener-Admin <sup>2</sup>, Michael Kim <sup>2</sup>, Scott Kopetz <sup>2</sup>, Mourad Majidi <sup>2</sup>, David Menter <sup>2</sup>, John  
500 Minna <sup>2</sup>, Hyunsil Park <sup>2</sup>, Fei Yang <sup>2</sup>, Brenda Timmons <sup>2</sup>, Jing Wang <sup>2</sup>, Shannon Westin <sup>2</sup>, Timothy  
501 Yap <sup>2</sup>, Jianhua Zhang <sup>2</sup>, Ran Zhang <sup>2</sup>, Min Jin Ha <sup>2</sup>, Huiqin Chen <sup>2</sup>, Yuanxin Xi <sup>2</sup>, Luc Girard <sup>2</sup>,  
502 Erkan Yucan <sup>2</sup>, Bryce P Kirby <sup>2</sup>, Bingbing Dai <sup>2</sup>, Yi Xu <sup>2</sup>, Alexey Sorokin <sup>2</sup>, Kelly Gale <sup>2</sup>, Jithesh  
503 Augustine <sup>2</sup>, Stephen Scott <sup>2</sup>, Ismail Meraz <sup>2</sup>, Dylan Fingerman <sup>3</sup>, Andrew Kossenkov <sup>3</sup>, Qin Liu <sup>3</sup>,  
504 Min Xiao <sup>3</sup>, Jayamanna Wickramasinghe <sup>3</sup>, Haiyin Lin <sup>3</sup>, Eric Ramirez-Salazar <sup>3</sup>, Kate Nathanson  
505 <sup>4</sup>, Mike Tetzlaff <sup>2</sup>, George Xu <sup>5</sup>, Vashisht G. Yennu-Nanda <sup>6</sup>, Rebecca Aft <sup>7</sup>, Jessica Andrews <sup>7</sup>,  
506 Alicia Asaro <sup>7</sup>, Song Cao <sup>7</sup>, Feng Chen <sup>7</sup>, Sherri Davies <sup>7</sup>, John DiPersio <sup>7</sup>, Ryan Fields <sup>7</sup>, Steven  
507 Foltz <sup>7</sup>, Katherine Fuh <sup>7</sup>, Kian Lim <sup>7</sup>, Jason Held <sup>7</sup>, Jeremy Hoog <sup>7</sup>, Reyka G. Jayasinghe <sup>7</sup>, Yize Li  
508 <sup>7</sup>, Jinqin Luo <sup>7</sup>, Cynthia Ma <sup>7</sup>, Jay Mashl <sup>7</sup>, Chia-Kuei Mo <sup>7</sup>, Fernanda Rodriguez <sup>7</sup>, Hua Sun <sup>7</sup>,  
509 Nadezhda V. Terekhanova <sup>7</sup>, Rose Tipton <sup>7</sup>, Brian VanTine <sup>7</sup>, Andrea Wang-Gillam <sup>7</sup>, Mike Wendl  
510 <sup>7</sup>, Yige Wu <sup>7</sup>, Matt Wyczalkowski <sup>7</sup>, Lijun Yao <sup>7</sup>, Daniel Cui Zhou <sup>7</sup>, Matthew Ellis <sup>8</sup>, Michael  
511 Ittmann <sup>8</sup>, Susan Hilsenbeck <sup>8</sup>, Bert O'Malley <sup>8</sup>, Amanda Kirane <sup>9</sup>, May Cho <sup>9</sup>, David Gandara <sup>9</sup>,  
512 Jonathan Reiss <sup>9</sup>, Tiffany Le <sup>9</sup>, Ralph De Vere White <sup>9</sup>, Cliff Tepper <sup>9</sup>, David Cooke <sup>9</sup>, Luis Godoy  
513 <sup>9</sup>, Lisa Brown <sup>9</sup>, Marc Dall'Era <sup>9</sup>, Christopher Evans <sup>9</sup>, Rashmi Verma <sup>9</sup>, Sepideh Gholami <sup>9</sup>, David  
514 J Segal <sup>9</sup>, John Albeck <sup>9</sup>, Edward Pugh <sup>9</sup>, Susan Stewart <sup>9</sup>, David Rocke <sup>9</sup>, Hongyong Zhang <sup>10</sup>,  
515 Nicole Coggins <sup>10</sup>, Ana Estrada <sup>10</sup>, Ted Toal <sup>10</sup>, Alexa Morales <sup>10</sup>, Guadalupe Polanco Echeverry  
516 <sup>10</sup>, Sienna Rocha <sup>10</sup>, Ai-Hong Ma <sup>9,11</sup>

517

518 1: Huntsman Cancer Institute, Salt Lake City, UT.

519 2: The University of Texas M.D. Anderson Cancer Center, Houston, TX.

520 3: The Wistar Institute, Philadelphia, PA.

521 4: Abramson Cancer Center, The University of Pennsylvania, Philadelphia, PA, USA

522 5: Hospital of the University of Pennsylvania, Philadelphia, PA, USA

523 6: Department of Melanoma Medical Oncology, MD Anderson Cancer Center, Houston, TX.

524 7: Washington University School of Medicine, St. Louis, MO.

525 8: Baylor College of Medicine, Houston, TX.

526 9: UC Davis Comprehensive Cancer Center, University of California – Davis, Davis, CA.

527 10: UC Davis Comprehensive Genomics Center, University of California – Davis, Davis, CA.

528 11: Jamaica Plains VA Medical Center, Veteran Administration, Jamaica Plains, MA.

529

530

531 **PDXNet Member Contribution**

532

533 **PDXNet Leadership and Data Submission**

534 AW, BDD, BW, CJB, CXP, DAD, FMB, JD, JM, JHC, JR, GW, LCC, LD, MD, MH,

535 MSC, MTW, NM, PNR, SK, SL, TW, YAE

536 **Data Science, Management and Processing**

537 AS, BJS, BW, CF, SK, MWL, SS, DAD, JG, JHC, SLS, SN, PDXNet Consortium, YAE,

538 XYW

539 **Portal Development**

540 AS, CF, DAD, JG, JHC, MWL, SK

541 **Portal Integration Planning**

542 SK, MWL, DAD, JG, MR, SLS, SS, JHC

543 **Writing Manuscript**

544 SK, MWL, DAD, JG, JHC

545

546

547 **Supplementary Tables**

548 **Supplementary Table 1. Metadata associated with Hematoxylin and eosin (H&E) Images**  
 549 **on the PDXNet Portal.**

---

| <b>Hematoxylin and Eosin (H&amp;E) Image Metadata</b> |                                        |
|-------------------------------------------------------|----------------------------------------|
| Age                                                   | Percent stromal content                |
| Cell annotation available?                            | Percent tumor content                  |
| Contributor                                           | Primary cancer site                    |
| CTEP Code                                             | Proteomics                             |
| Diagnosis Subtype                                     | Race                                   |
| Disease Type                                          | Regional annotation available?         |
| Engraftment site                                      | RNA-Seq/ Exp array                     |
| Ethnicity                                             | Sample ID                              |
| Gender                                                | Sample Type                            |
| Histology                                             | SNP array                              |
| Image file name                                       | Stain                                  |
| Is information of this model already in CGC?          | Staining/scanning method available?    |
| Magnification                                         | Thumbnail                              |
| Metastatic site                                       | Treatment                              |
| Model ID                                              | Treatment information in patient tumor |
| Mouse strain                                          | Treatment information in PDX tumor     |
| Note                                                  | Tumor Biomarkers                       |
| Original Species                                      | Tumor differentiation                  |
| Other pathology notes                                 | Tumor Grade                            |
| Passage                                               | Tumor Stage                            |
| Patient ID                                            | WES/Mutations                          |
| Percent necrotic content                              |                                        |

---

550

551



552 **Supplementary Table 2. Supportive interactive table options on the PDXNet portal**

---

**Supported Interactive  
Tables and Charts**

---

Area Chart

Col Heatmap

Horizontal Bar Chart

Horizontal Stacked Bar Chart

Line Chart

Row Heatmap

Scatter Chart

Table

Table Bar Chart

Treemap

---

553

554

555

556

557 **Supplementary Table 3. Data summary options available through interactive tables on the**  
558 **PDXNet Portal**

---

**Interactive Table Data Summary Options**

---

|                             |                           |
|-----------------------------|---------------------------|
| Average                     | Median                    |
| Count                       | Minimum                   |
| Count as fraction of column | Sample variance           |
| Count as fraction of row    | Standard deviation        |
| Count as fraction of total  | Sum                       |
| Count unique values         | Sum as fraction of column |
| First                       | Sum as fraction of row    |
| Integer sum                 | sum as fraction of total  |
| Last                        | sum over sum              |
| List unique values          | 80% lower bound           |
| maximum                     | 80% upper bound           |

---

559

560

561 **Supplementary Table 4. PDXNet metadata fields available on the Interactive Table**  
562 **Explorer on the PDXNet Portal**

---

| <b>PDXNet Metadata Fields Available on the Interactive Table Explorer</b> |                |
|---------------------------------------------------------------------------|----------------|
| Access Level                                                              | File size      |
| Availability                                                              | Gender         |
| Capture Assembly                                                          | Investigations |
| Capture Kit                                                               | Is FFPE        |
| Case id                                                                   | Model id       |
| Comments                                                                  | Paired End     |
| Contributor                                                               | Patient id     |
| Created Date and time                                                     | Platform       |
| Data Category                                                             | Public         |
| Data Format                                                               | Sample ID      |
| Data Type                                                                 | Sample type    |
| experimental strategy                                                     | Tumor id       |
| File name                                                                 |                |

---

563

564

565 **Supplementary Table 5. Patient-derived model repository sequencing data processed with**  
566 **standardized PDXNet workflows referenced on the PDXNet Portal**

| <b>Sample Type, n(%)</b> | <b>Overall<br/>N=9492</b> | <b>RNA-Seq<br/>N=4480</b> | <b>WES<br/>N=5012</b> |
|--------------------------|---------------------------|---------------------------|-----------------------|
| Normal                   | 520(5.5%)                 | 0(0%)                     | 520(10%)              |
| Organoid                 | 304(3.2%)                 | 152(3.4%)                 | 152(3.0%)             |
| PDC                      | 276(2.8%)                 | 124(2.8%)                 | 152(3.0)              |
| PDX                      | 7846(83%)                 | 3930(88%)                 | 3916(78%)             |
| Tumor                    | 542(5.7)                  | 274(6.1%)                 | 268(5.3%)             |
| unknown                  | 4(<0.1%)                  | 0(0%)                     | 4(<0.1%)              |

567

568 **Supplementary Table 6. Standardized PDXNet bioinformatics workflows linked to the**  
569 **PDXNet Portal**

---

**Workflow Description**

---

**RNA-Seq**

Prepare Multi-sample Data

PDX RNA Expression Estimation Workflow

PDX RNA Expression Estimation Workflow (Single End)

RNA Expression Estimation Workflow Patient Tumor

RNA Expression Workflow Patient Tumor (Single End)

---

**Whole Exome Sequence**

PDX WES CNV (Xenome) Tumor-Normal Workflows

PDX WES Tumor-Normal (Xenome) with Variant Calling, CNV Estimation, TMB, MSI, and HRD Scores

PDX WES Tumor-Only (Xenome) with Variant Calling, MSI, and TMB Scores

WES Tumor-Normal with Variant Calling, CNV Estimation, TMB, MSI, and HRD Scores

WES Tumor-Only with Variant Calling, MSI, and TMB Scores

WES Tumor-Only from BAM (Variant, MSI, TMB)

WES Tumor-Normal from BAM(Variant, CNV, HRD, MSI, TMB)

---

**SNP Array**

SNP Array Tumor-Only Workflow for Illumina Infinium Omni 2.5 Exome-8 (Version 1.4) Snp Array

---

**Quality**

PDX WES Sample QC

PDX Sample QC

---

570

571

572 **Supplementary Table 7. Summary of computed ancestry for PDXNet Models**

|                           | Contributors |           |            |           | # of Patients |
|---------------------------|--------------|-----------|------------|-----------|---------------|
|                           | HCI-BCM      | MDACC     | PDMR       | WUSTL     |               |
| AFR                       | 10           | 3         | 8          | 3         | 24            |
| Adenocarcinoma - colon    |              |           | 4          |           | 4             |
| Adenocarcinoma - pancreas |              |           |            | 2         | 2             |
| Adenocarcinoma - rectum   |              |           | 1          |           | 1             |
| Invasive breast carcinoma | 10           |           |            |           | 10            |
| Lung Adenocarcinoma       |              | 3         | 2          |           | 5             |
| Melanoma                  |              |           | 1          | 1         | 2             |
| AMR                       | 18           | 2         |            |           | 20            |
| Invasive breast carcinoma | 18           |           |            |           | 18            |
| Lung Adenocarcinoma       |              | 2         |            |           | 2             |
| EAS                       |              |           | 1          |           | 1             |
| Adenocarcinoma - colon    |              |           | 1          |           | 1             |
| EUR                       | 8            | 30        | 158        | 24        | 220           |
| Adenocarcinoma - colon    |              |           | 72         | 7         | 79            |
| Adenocarcinoma - pancreas |              |           | 24         | 13        | 37            |
| Adenocarcinoma - rectum   |              |           | 14         | 1         | 15            |
| Invasive breast carcinoma | 8            |           | 10         | 2         | 20            |
| Lung Adenocarcinoma       |              | 30        | 14         | 1         | 45            |
| Melanoma                  |              |           | 24         |           | 24            |
| MIX                       | 1            | 2         | 3          |           | 6             |
| Adenocarcinoma - colon    |              |           | 1          |           | 1             |
| Adenocarcinoma - pancreas |              |           | 1          |           | 1             |
| Invasive breast carcinoma | 1            |           |            |           | 1             |
| Lung Adenocarcinoma       |              | 2         | 1          |           | 3             |
| <b># of Patients</b>      | <b>37</b>    | <b>37</b> | <b>170</b> | <b>27</b> | <b>271</b>    |

HCI-BCM: Huntsman Cancer Center, MDACC: MD Anderson Cancer Center, PDMR: Patient-Derived Model Repository, WUSTL: Washington University at St. Louis

573

574



575 **Supplementary Table 8. Summary of PDMMR tumor volume dataset on the PDXNet portal**  
 576 **shown by disease type and treatment**

| Disease              | Treatment |      |             |           |             |            |            |             | Total |
|----------------------|-----------|------|-------------|-----------|-------------|------------|------------|-------------|-------|
|                      | Control   | 5-FU | Carboplatin | Erlotinib | Gemcitabine | Irinotecan | Paclitaxel | Vemurafenib |       |
| Colon                | 13        | 10   | 10          | 7         | 11          | 11         | 11         | 7           | 81    |
| Lung                 | 13        | 9    | 10          | 8         | 10          | 10         | 10         | 8           | 78    |
| Pancreas             | 12        | 11   | 1           | 9         | 11          | 11         | 11         | 7           | 82    |
| Skin                 | 9         | 7    | 1           | 3         | 7           | 6          | 7          | 3           | 48    |
| Bladder              | 7         | 5    | 1           | 3         | 5           | 6          | 6          | 4           | 42    |
| Head and Neck        | 10        | 5    | 1           | 4         | 6           | 6          | 6          | 3           | 45    |
| Kidney               | 2         | 2    |             | 1         | 2           | 2          | 2          | 1           | 14    |
| Ovarian              | 1         | 1    | 1           |           | 1           | 1          | 1          |             | 6     |
| Uterine              | 4         | 4    | 1           | 1         | 4           | 4          | 4          | 1           | 26    |
| Gastric              | 1         | 1    | 1           | 1         | 1           | 1          | 1          | 1           | 8     |
| Soft Tissue Neoplasm | 9         | 8    | 3           | 2         | 9           | 9          | 9          | 1           | 54    |
| Endocrine            | 1         | 1    | 3           | 1         | 1           | 1          | 1          |             | 7     |
| Bone                 | 1         | 1    | 1           |           | 1           |            | 1          |             | 5     |
| CNS                  | 3         | 3    | 1           | 2         | 3           | 3          | 3          | 2           | 22    |
| Rectum               | 1         | 1    | 1           |           | 1           | 1          | 1          |             | 6     |
| Grand Total          | 87        | 69   | 36          | 42        | 73          | 72         | 74         | 38          | 524   |

577

578

## 579 Graphical User Interface Screenshots

### 580 Resources

581

A

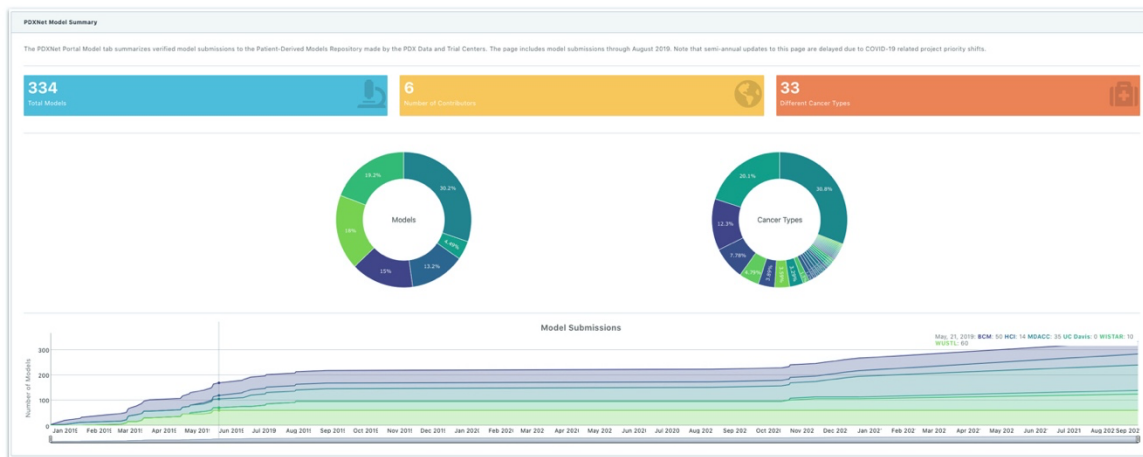

B

| PDXSource                 | Contributor | Contributor PDX ID | PDMR Patient ID | Gender | CTEP SDC Code | CTEP SDC Description   | Diagnosis Subtype                                                  | Disease Body Location      | Age at Diagnosis | Date of Diagnosis | Has Known Metastatic Disease | Grade/Stage Information | Patient ID                                       |
|---------------------------|-------------|--------------------|-----------------|--------|---------------|------------------------|--------------------------------------------------------------------|----------------------------|------------------|-------------------|------------------------------|-------------------------|--------------------------------------------------|
| All                       | All         | All                | All             | All    | All           | All                    | All                                                                | All                        | All              | All               | All                          | All                     | A                                                |
| PDXNet Consortium Members | MDACC       | B8174              | K42829          | Female | 10009951      | Adenocarcinoma - colon | adenocarcinoma of sigmoid colon                                    | Digestive/Gastrointestinal | 48               | 42790             | Yes                          | Stage                   | Gri<br>Stage<br>IC<br>me<br>Panc<br>Ches<br>Lymc |
| PDXNet Consortium Members | MDACC       | B8175              | K30337          | Female | 10009951      | Adenocarcinoma - colon | adenocarcinoma                                                     | Digestive/Gastrointestinal | 26               | 42500             | Yes                          | Stage                   | Gri<br>Stage<br>diff<br>LC<br>me<br>Panc         |
| PDXNet Consortium Members | MDACC       | B8176              | K45526          | Female | 10009951      | Adenocarcinoma - colon | Lynch syndrome, mucinous and signet ring cell adenocarcinoma       | Digestive/Gastrointestinal | 41               | 42132             | Not Reported                 | TNM (Pathological)      | Gri<br>dT<br>diff<br>LC<br>me<br>Liver           |
| PDXNet Consortium Members | MDACC       | B8182              | K75566          | Female | 10009951      | Adenocarcinoma - colon | poorly differentiated mucinous and signet ring cell adenocarcinoma | Digestive/Gastrointestinal | 54               | 42644             | Yes                          | Stage, TNM              | Gri<br>Stage<br>LC<br>me                         |

582  
583 **Supplement Figure 1. PDX models generated by PDXNet researchers shown on the PDXNet**  
584 **Portal**

585 Figure shows components of the PDXNet Model sequencing data page in separate panels (A) Panel  
586 shows summary statistics including number of total models (blue), number of contributors  
587 (yellow), and number of cancer types (orange). Also, shown are donut plots for contributors and  
588 cancer types. Below the donut plots is a chart showing the number of models generated since  
589 January 2019. (B) Panel shows metadata for the PDXNet PDX models in a spreadsheet format.  
590 The interface supports searching and sorting metadata. Users can copy, print, and download  
591 metadata into accessible formats.

592

A

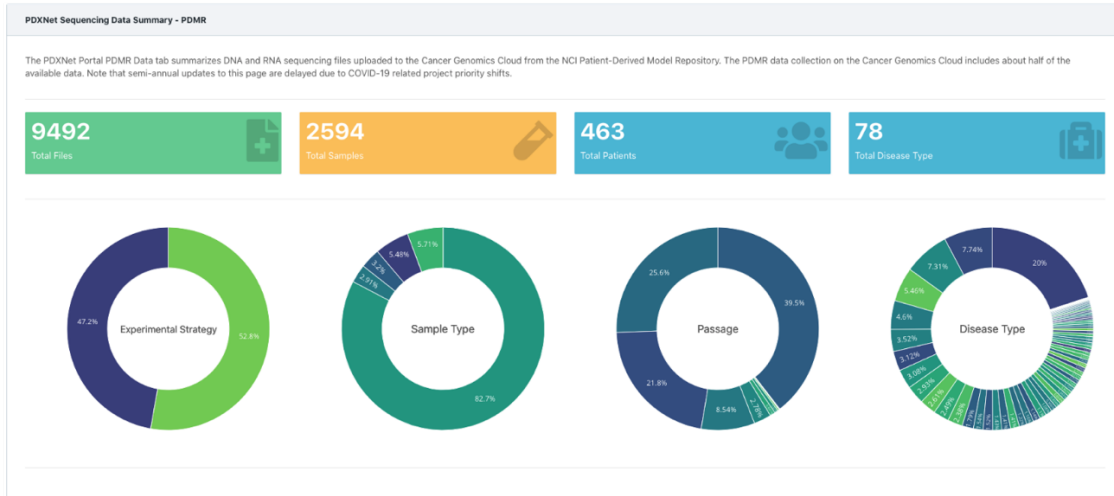

B

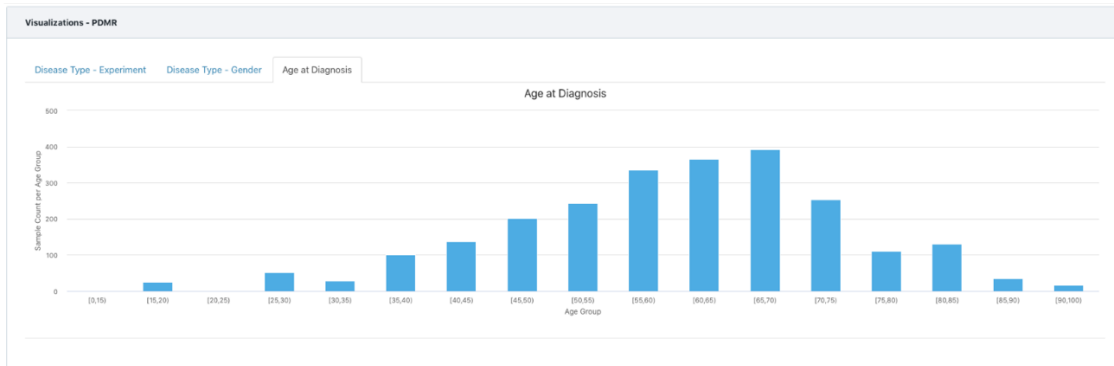

C

**Metadata**

Column visibility    Copy    Print    Download

Search:

Show  entries

| contributor | name                                                     | project                             | Patient.ID | gender | disease_type              | Capture_assembly | sample_id              | PDMR.Version | PDMR.Sample.ID | Is.PDMR.Version.2 | Passage | paired_end | samp   |
|-------------|----------------------------------------------------------|-------------------------------------|------------|--------|---------------------------|------------------|------------------------|--------------|----------------|-------------------|---------|------------|--------|
| 1           | NCI 113646-v2.0.1.10.0-germlineWES.R1.FASTQ.gz           | jeffrey.grover pdxnet-pdmr-datapool | 113646     | Female | Invasive breast carcinoma | hg19             | 113646                 | 2_0_1_10_0   |                | Y                 |         | A          | 1 norm |
| 2           | NCI 113646-v2.0.1.10.0-germlineWES.R2.FASTQ.gz           | jeffrey.grover pdxnet-pdmr-datapool | 113646     | Female | Invasive breast carcinoma | hg19             | 113646                 | 2_0_1_10_0   |                | Y                 |         | A          | 2 norm |
| 3           | NCI 114348-004-R-ATHY2ZE99-v2.0.1.4.0-RNASEQ.R1.FASTQ.gz | jeffrey.grover pdxnet-pdmr-datapool | 114348     | Male   | Adenocarcinoma - rectum   | hg19             | 114348-004-B-ATHY2ZE99 | 2_0_1_4_0    | ATHY2ZE99      | Y                 | P2      |            | 1      |
| 4           | NCI 114348-004-R-ATHY2ZE99-v2.0.1.4.0-RNASEQ.R2.FASTQ.gz | jeffrey.grover pdxnet-pdmr-datapool | 114348     | Male   | Adenocarcinoma - rectum   | hg19             | 114348-004-B-ATHY2ZE99 | 2_0_1_4_0    | ATHY2ZE99      | Y                 | P2      |            | 2      |
| 5           | NCI 114348-004-R-ATHY2ZE99-v2.0.1.51.0-WES.R1.FASTQ.gz   | jeffrey.grover pdxnet-pdmr-datapool | 114348     | Male   | Adenocarcinoma - rectum   | hg19             | 114348-004-B-ATHY2ZE99 | 2_0_1_51_0   | ATHY2ZE99      | Y                 | P2      |            | 1      |

Showing 1 to 5 of 9,492 entries

Previous    1    2    3    4    5    ...    1899    Next

593  
594  
595

**Supplement Figure 2. Patient Derived Model Repository (PDMR) sequencing data listed on the PDXNet portal**

596 Figure shows components of the PDMR sequencing data page in separate panels **(A)** Panel shows  
597 summary statistics including number of sequencing files (green), contributors (yellow), total  
598 samples (orange), and total patients (blue). Also, shown are donut plots for contributors, sample  
599 types, disease type, experimental strategy, WES contributors, and RNA-Seq contributors. **(B)**  
600 Panel shows age from PDMR patients on a bar chart. **(C)** Panel shows metadata for the PDMR  
601 sequencing data in a spreadsheet format. The interface supports searching and sorting metadata.  
602 Users can copy, print, and download metadata into accessible formats.  
603

604

A

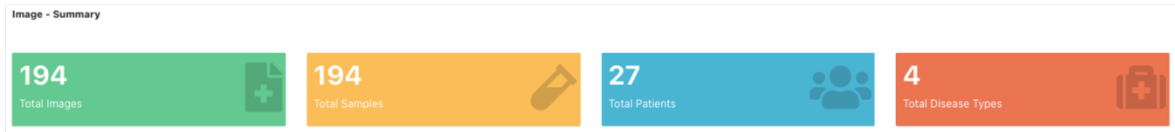

B

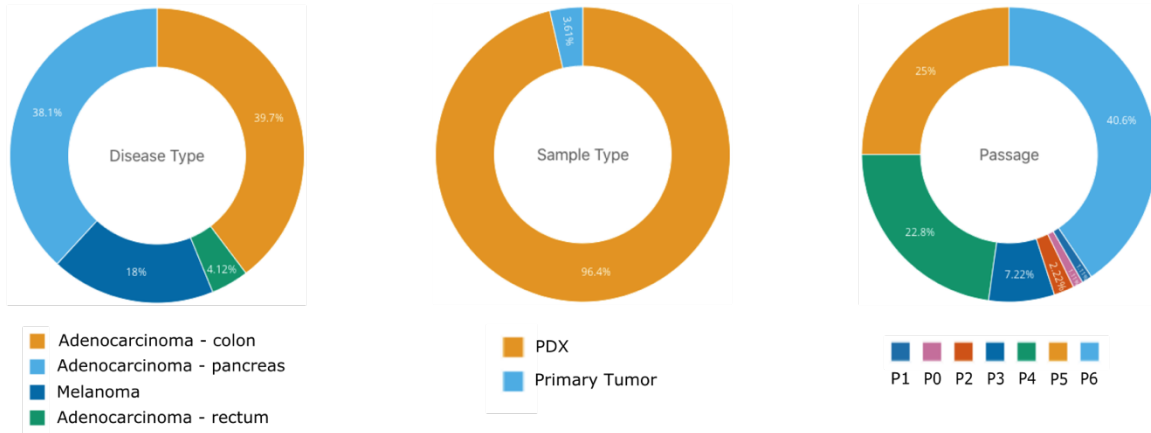

C

| Contributor | Thumbnail | Model        | Specimen ID | Sample ID            | Image ID | Capture Date         | Date Loaded to BW_Transfers | Notes                      | Model ID | Disease Type | Sample Type | Age at Diagnosis | Passage |
|-------------|-----------|--------------|-------------|----------------------|----------|----------------------|-----------------------------|----------------------------|----------|--------------|-------------|------------------|---------|
| All         | All       | All          | All         | A                    | A        | All                  | All                         | /                          | /        | A            | A           | All              | A       |
| 1           |           | 128128-338-R | 338-R       | 128128-338-R--L42    | 11933    | 2015-06-23T00:00:00Z | 2020-12-08T00:00:00Z        | PDXID & SampleID Corrected | 128128   | Melanoma     | PDX         | 47               | P0      |
| 2           |           | 128128-338-R | 338-R       | 128128-338-R--L43    | 11925    | 2015-06-23T00:00:00Z | 2020-12-08T00:00:00Z        | PDXID & SampleID Corrected | 128128   | Melanoma     | PDX         | 47               | P0      |
| 3           |           | 128128-338-R | 338-R       | 128128-338-R--L43MZ1 | 13795    | 2015-11-03T00:00:00Z | 2020-12-08T00:00:00Z        | PDXID & SampleID Corrected | 128128   | Melanoma     | PDX         | 47               | P1      |
| 4           |           | 128128-338-R | 338-R       | 128128-338-R--L44NT6 | 13798    | 2015-11-03T00:00:00Z | 2020-12-08T00:00:00Z        | PDXID & SampleID Corrected | 128128   | Melanoma     | PDX         | 47               | P1      |
| 5           |           | 128128-338-R | 338-R       | 128128-338-R--L43MZ4 | 14278    | 2015-11-06T00:00:00Z | 2020-12-08T00:00:00Z        | PDXID & SampleID Corrected | 128128   | Melanoma     | PDX         | 47               | P1      |

Showing 1 to 5 of 194 entries

Previous 1 2 3 4 5 ... 39 Next

605  
606  
607

**Supplement Figure 3. Patient-Derived Model Repository (PDMR) image page on the PDXNet Portal**

608 Figure shows components of the PDMR image data page in separate panels **(A)** Panel shows  
609 summary statistics including number of images (green), contributors (yellow), total patients (blue),  
610 and total disease types (red). **(B)** Panel B shows donut plots for disease type, sample type, and  
611 passage. **(C)** Panel shows metadata for the PDMR image data in a spreadsheet format. The  
612 interface supports searching and sorting metadata. Users can copy, print, and download metadata  
613 into accessible formats.

614

**Interactive Exploration**

The PDXNet Portal Interactive tab allows users to interactively create tables from the list of DNA and RNA sequencing file uploaded to the Cancer Genomics Cloud by the PDX Data and Trial Centers. The page includes data uploads through August 2019.

**Pivot Tables**

PDMR Files | PDX Files

Table: Count

experimental\_strategy

| contributor | sample_type | experimental_strategy | RNA-Seq | WES   | Totals |
|-------------|-------------|-----------------------|---------|-------|--------|
| BCM         | PDX         |                       | 102     | 106   | 208    |
| HCI         | Normal      |                       |         | 120   | 120    |
|             | PDX         |                       |         | 386   | 386    |
|             | Tumor       |                       |         | 384   | 384    |
|             | null        |                       |         | 1     | 1      |
| MDACC       | Normal      |                       |         | 142   | 142    |
|             | PDX         |                       | 6       | 140   | 146    |
|             | Tumor       |                       |         | 130   | 130    |
| UC Davis    | Tumor       |                       | 32      | 16    | 48     |
| WISTAR      | PDX         |                       | 144     | 58    | 202    |
|             | Tumor       |                       |         | 104   | 104    |
|             | blood       |                       |         | 76    | 76     |
| WUSTL       | Normal      |                       |         | 218   | 218    |
|             | PDX         |                       | 260     | 255   | 515    |
|             | Tumor       |                       |         | 142   | 142    |
| Totals      |             |                       | 544     | 2,278 | 2,822  |

615

#### 616 Supplement Figure 4. Interactive data explorer page on the PDXNet Portal

617 Figure shows the interactive exploration page on the PDXNet portal. The user can interactively  
618 create a pivot table with either the metadata from the PDXNet sequencing data or the PDMR  
619 sequencing data. Constructing the table involves dragging and dropping table fields on the left side  
620 to the table area (green) on the right side of the screen.

621



The screenshot displays the 'PDX Workflows' page on the PDXNet Portal. At the top, a header reads 'PDX Workflows'. Below this, a paragraph states: 'The PDX Coordination Center implemented standardized data processing workflows for all data uploaded by PDXNet researchers to the Cancer Genomics Cloud. The workflows are implemented in Common Workflow Language in order to facilitate portability. Links to individual workflows can be found below. Please go to the Cancer Genomics Cloud public apps gallery to see an up-to-date list of available PDX workflows.'

The main content area features six workflow cards arranged in a 2x3 grid. Each card includes a title, a brief description, and a green 'Open' button with an external link icon.

- Card 1 (Top Left):** 'PDX WES CNV (Xenome) Tumor-Normal Workflow'. Description: 'This Whole Exome Sequencing (WES) Tumor-Normal workflow identifies copy number variants from a human exome experiment by primarily using the Broad Institutes best-practices workflow for alignment and the Sequenza R package to estimate genome wide copy number.'
- Card 2 (Top Middle):** 'PDX WES Tumor-Normal (Xenome) with Variant Calling, CNV estimation, TMB, MSI, and HRD scores'. Description: 'This Whole Exome Sequencing (WES) tumor-normal workflow first uses the Broad Institutes best-practices workflow for read alignment, and then analyzes those data in several ways.'
- Card 3 (Top Right):** 'PDX WES Tumor-Only (Xenome) with Variant Calling, MSI, and TMB scores'. Description: 'This Whole Exome Sequencing (WES) tumor-normal workflow first uses the Broad Institutes best-practices workflow for read alignment, and then analyzes those data in several ways. Identifies variants from a human exome experiment with GATK-4 Mutect2 for variant calling. Calculates microsatellite instability (MSI) status using MSIsensor2. Calculates tumor mutation burden (TMB) score using filtered variants.'
- Card 4 (Bottom Left):** 'WES Tumor-Normal with Variant Calling, CNV estimation, TMB, MSI, and HRD scores'. Description: 'This Whole Exome Sequencing (WES) tumor-normal workflow first uses the Broad Institutes best-practices workflow for read alignment, and then analyzes those data in several ways. Identifies variants from a human exome experiment with GATK-4 Mutect2 for variant calling. Estimates genome wide copy number with the Sequenza R package. Calculates tumor mutation burden (TMB) score using filtered variants. Calculates microsatellite instability (MSI) status using Mantis. Calculated Homologous recombination deficiency (HRD) score using scarHRD with output from Sequenza.'
- Card 5 (Bottom Middle):** 'WES Tumor-Only with Variant Calling, MSI, and TMB scores'. Description: 'This Whole Exome Sequencing (WES) tumor-only workflow first uses the Broad Institutes best-practices workflow for read alignment, and then analyzes those data in several ways. Identifies variants from a human exome experiment with GATK-4 Mutect2 for variant calling. Calculates microsatellite instability (MSI) status using MSIsensor2. Calculates tumor mutation burden (TMB) score using filtered variants.'
- Card 6 (Bottom Right):** 'PDX WES Sample QC'. Description: 'This Whole Exome Sequencing (WES) tumor-normal workflow first uses the Broad Institutes best-practices workflow for read alignment, and outputs sample QC metric files. Note: This workflow utilizes the tool Xenome to removed mouse-reads from the raw-read data. Xenome uses host and graft reference sequences to characterize the set of all possible k-mers according to whether they belong to: only the graft (and not the host), only the host (and not the graft), both references, neither reference, and marginal assignments. This workflow uses those reads classified as human-only. Step1: SBG Split Pair by Metadata. Step2: Alignment and Target Coverage. Step3: indexing BAM files (Samtools Index BAM). Step4: Somalier Extract.'

622  
623 **Supplement Figure 5. Standardized PDXNet processing workflows shown on the PDXNet**  
624 **Portal**

625 Figure shows a section of the workflow page on the PDXNet portal. The page includes brief  
626 descriptions of standardized workflows created to process RNA-Seq, whole exome, and to a lesser  
627 extent array data. The page includes links to comprehensive workflow documentation on the  
628 Cancer Genomics Cloud Public Apps Gallery; where the workflows are made publicly available.  
629

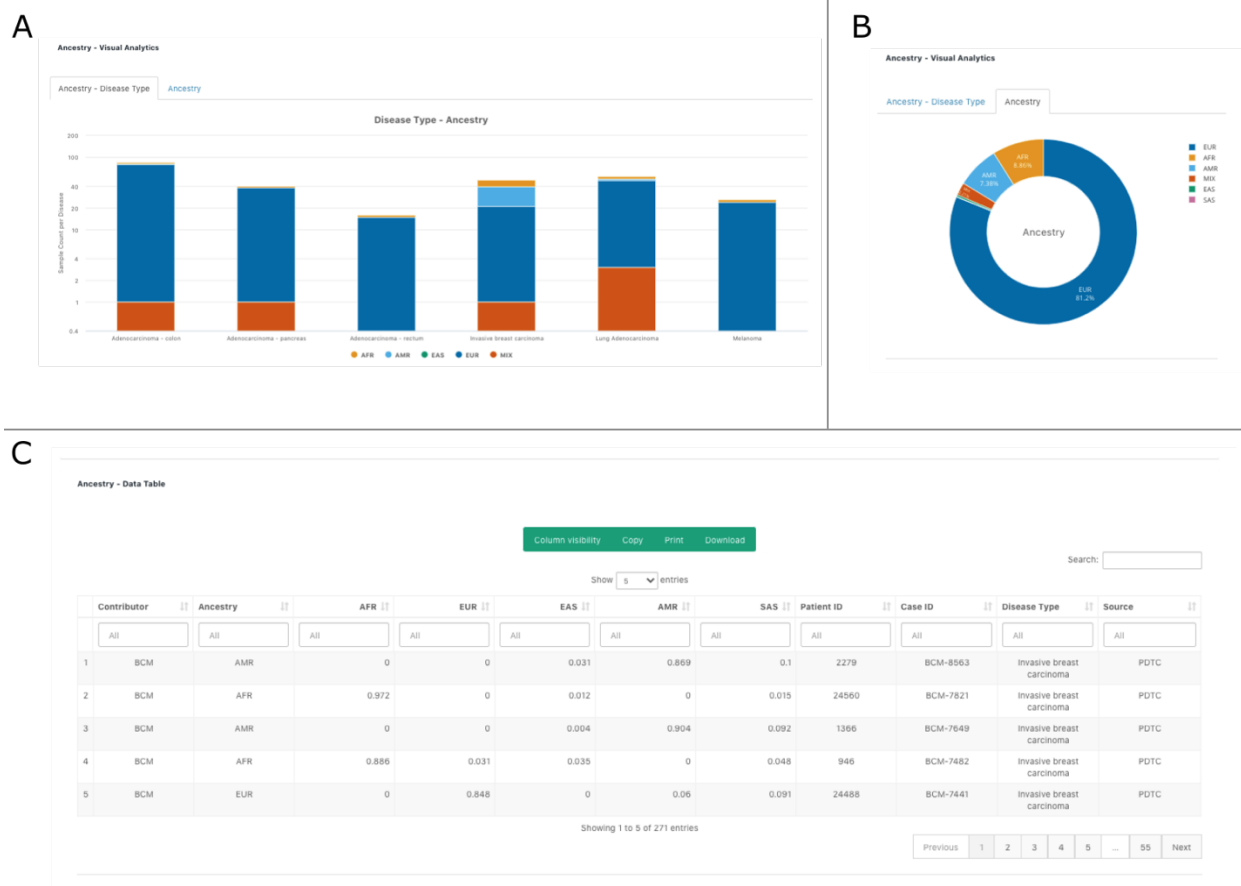

630  
631 **Supplement Figure 6. Ancestry information computed from sequencing data shown on the**  
632 **PDXNet Portal**

633 Figure shows plots generated on the ancestry data page of the PDXNet portal **(A)** Panel A shows  
634 a stacked bar chart with each bar corresponding to a user selected disease. Each bar shows the  
635 ancestry composition of available samples by color. The ancestry algorithm classifies samples as  
636 African (AFR), American (AMR), East Asian (EAS), South Asian (SAS), and Mixed (MIX). **(B)**  
637 Panel shows computed ancestry in a pie chart. Ancestry is classified in the following categories:  
638 European(EUR), African(AFR), American(AMR), Mixed(MIX), East Asian(EAS), South  
639 Asian(SAS). **(C)** Panel shows ancestry metadata for the processed sequencing data in a spreadsheet  
640 format. The interface supports searching and sorting metadata. Users can copy, print, and  
641 download metadata into accessible formats.

A

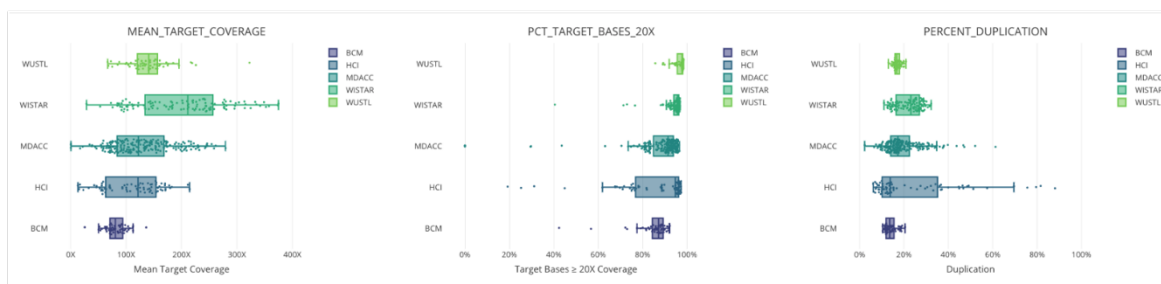

B

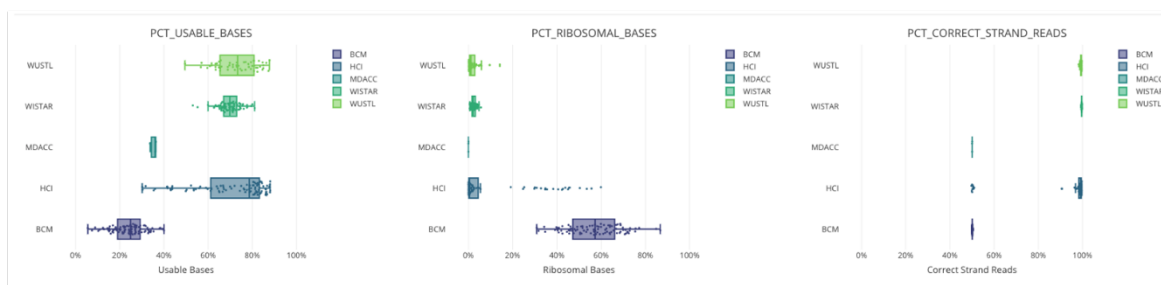

C

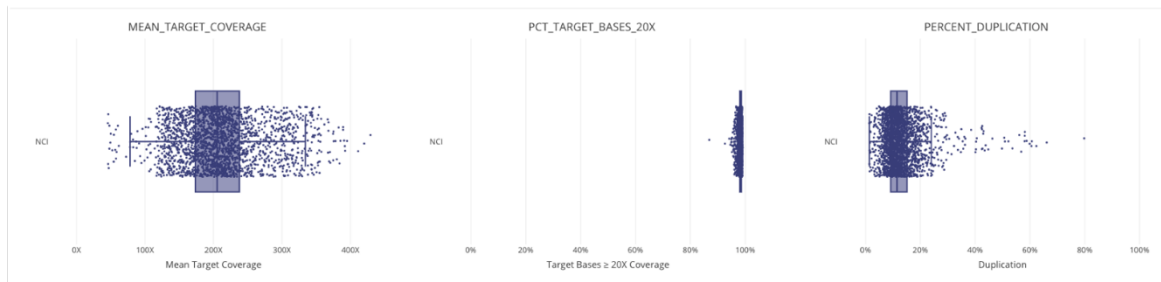

D

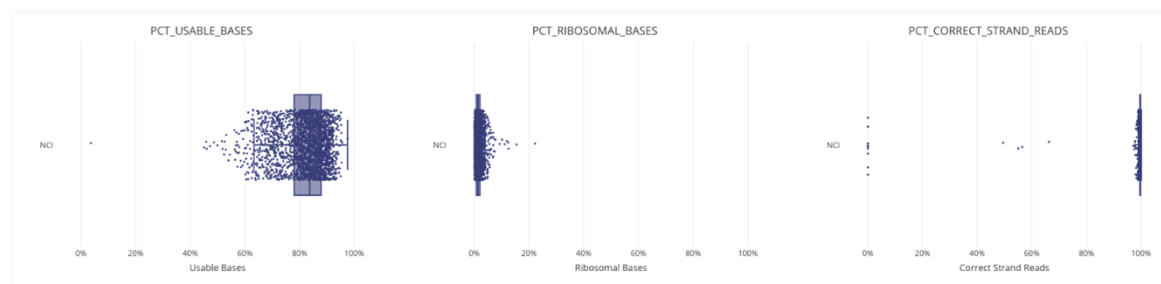

642

643 **Supplement Figure 7. Sequencing quality control plots examples generated on the PDXNet**  
644 **Portal**

645 Figure shows sequencing data QC figures generated on the quality control page of the PDXNet  
646 Portal (A) Plot shows mean target coverage, percent target coverage at 20x, and percent duplication

647 as box plots with data for each PDX Development and Trial Center presented as a different box  
648 plot. (B) Plot shows percent usable basis, percent ribosomal basis, and percent correct strand reads  
649 as box plots with data for each PDX Development and Trial Center presented as a different box  
650 plot. (C) Plot shows mean target coverage, percent target coverage at 20x, and percent duplication  
651 as box plots generated from PDMR data. (D) Plot shows percent usable basis, percent ribosomal  
652 basis, and percent correct strand reads as box plots generated from PDMR data.  
653
